# Supplementary material for: Dynamic dysregulation of retrotransposons in neurodegenerative diseases at the single-cell level
Source: HighWire-hosted journal article supplement (doi:10.1101/gr.279363.124), 2024-10-01
Supplement: Supplemental_Table_S1.xlsx [file Supplemental_Table_S1.xlsx]

## Sheet: Sheet1
Supplemental Table S1. Summary of the datasets used in this study.
Dataset	Sample number	Brain region	Disease	Cell #	Disease stage	GEO/Synapse accession
AD_HS_00001	48	Dorsolateral prefrontal cortex	AD	35843	AD, Control	syn18485175
AD_HS_00002	32	Entorhinal Cortex	AD	48498	AD, Control	GSE138852
AD_HS_00003.1, AD_HS_00003.2	20	Superior frontal gyrus; Entorhinal cortex	AD	97823	Braak 0, 2, 6	GSE147528
AD_HS_00004	32	Dorsolateral prefrontal cortex	AD	110232	AD, Control	syn21125841
AD_HS_00005	92	Prefrontal cortex	AD	54320	AD, Control	GSE157827
AD_HS_00006	35	Prefrontal cortex	AD	50444	AD, Control	GSE129308
AD_HS_00007	152	Prefrontal cortex	AD	39713	AD, Control	GSE174367
AD_HS_00008	120	Prefrontal cortex	AD	69674	AD, Control	GSE167494
MS_HS_00001	12	Brain	MS	77982	MS, Control	GSE180759
MS_HS_00002	38	Cortical grey matter	MS	19417	MS, Control	PRJNA544731
PD_HS_00001	21	Midbrain	PD	30931	PD, Control	GSE157783
PD_HS_00002	21	Putamen	PD	18028	PD, Control	GSE161045
