# Supplementary material for: Dynamic dysregulation of retrotransposons in neurodegenerative diseases at the single-cell level
Source: HighWire-hosted journal article supplement (doi:10.1101/gr.279363.124), 2024-10-01
Supplement: Supplemental_Table_S2.xlsx [file Supplemental_Table_S2.xlsx]

## Sheet: Sheet1
Supplemental Table S2. Summary of the copy number and total length of RTE families in the human genome.
Class	RTE families	Copy #	Total length
SINE	Alu	1282821	333247107
SINE	MIR	616589	88479334
SINE	tRNA-RTE	5695	724321
SINE	tRNA	2295	278015
SINE	5S-Deu-L2	2588	277877
SINE	tRNA-Deu	643	65803
LTR	ERVL-MaLR	367470	117607537
LTR	ERV1	188489	91378434
LTR	ERVL	174276	61144882
LTR	ERVK	11903	10155187
LTR	Gypsy	24975	5128552
LTR	LTR	3438	739913
LINE	L1	1031524	554713913
LINE	L2	486431	108917994
LINE	CR1	69603	12459756
LINE	RTE-X	15944	3646442
LINE	RTE-BovB	9297	1348364
LINE	Dong-R4	548	118445
LINE	Penelope	1128	101296
LINE	I-Jockey	5	599
LINE	L1-Tx1	1	174
