# Supplementary material for: Dynamic dysregulation of retrotransposons in neurodegenerative diseases at the single-cell level
Source: HighWire-hosted journal article supplement (doi:10.1101/gr.279363.124), 2024-10-01
Supplement: Supplemental_Table_S3.xlsx [file Supplemental_Table_S3.xlsx]

## Sheet: Sheet1
Supplemental Table S3. Number of cells in all datasets used in this study.
	Ast	Ex	In	Oli	OPC	Endo	Mic	VLMC	Total
AD_HS_00001	1606	14963	3167	13056	1399	300	992	360	35843
AD_HS_00003.1	4508	22420	4812	12598	2059	434	1465	202	48498
AD_HS_00003.2	3033	19111	4040	11974	1963	657	1765	225	42768
AD_HS_00004	2955	23922	3475	19946	1265	396	3029	67	55055
AD_HS_00005	10958	45013	7348	34330	6669	823	4179	912	110232
AD_HS_00006	1086	41360	9071	1779	434	141	327	122	54320
AD_HS_00007	2929	21631	2970	18757	960	396	2642	159	50444
AD_HS_00008	6112	11578	2688	16922	689	304	1253	167	39713
MS_HS_00001	2061	27480	11817	23505	1503	181	2376	751	69674
MS_HS_00002	3425	40932	6576	18818	2800	2283	1839	1309	77982
AD_HS_00002	1668	6080	3264	6542	866	144	643	210	19417
PD_HS_00001	2637	9109	1623	12927	1293	623	2469	250	30931
PD_HS_00002	1859	5508	1344	7183	577	244	1250	63	18028
