# Supplementary material for: Dynamic dysregulation of retrotransposons in neurodegenerative diseases at the single-cell level
Source: HighWire-hosted journal article supplement (doi:10.1101/gr.279363.124), 2024-10-01
Supplement: Supplemental_Table_S4.xlsx [file Supplemental_Table_S4.xlsx]

## Sheet: Sheet1
Supplemental Table S4. Number of cells in AD_HS_00001 and AD_HS_00002 (AD_HS_00001, AD_HS_00002) with or without (AD_HS_00001_NoIntron, AD_HS_00002_ NoIntron) the nointron mode in scTE.
	Ast	Ex	In	Oli	OPC	Endo	Mic	VLMC	Total
AD_HS_00001_NoIntron	1948	7826	2237	10054	1561	86	740	23	24475
AD_HS_00001	1606	14963	3167	13056	1399	300	992	360	35843
AD_HS_00002_NoIntron	1685	5101	2610	6371	775	29	524	215	17310
AD_HS_00002	1668	6080	3264	6542	866	144	643	210	19417
