# Supplementary material for: Dynamic dysregulation of retrotransposons in neurodegenerative diseases at the single-cell level
Source: HighWire-hosted journal article supplement (doi:10.1101/gr.279363.124), 2024-10-01
Supplement: Supplemental_Table_S5.xlsx [file Supplemental_Table_S5.xlsx]

## Sheet: Sheet1
Supplemental Table S5. Differentially expressed RTEs in AD vs the control identified from excitatory neurons (dataset AD_HS_00003.1).
Gene	Log2FC	P_adj	AD_PoE	Control_PoE	Exp_trend
L1PBa	-1.79408	307.653	0.459116	0.787726	Down
L1PA12	-1.53392	307.653	0.39572	0.680862	Down
L1PA7	-0.669794	307.653	0.999058	0.998545	Down
L1PB1	-0.645784	307.653	0.996568	0.998677	Down
L1PA10	-0.644168	307.653	0.961236	0.985848	Down
L1PA5	-0.568086	307.653	0.994751	0.997619	Down
L1MA3	-0.525532	307.653	0.99152	0.997355	Down
L1PA8A	-1.09491	304.566	0.703749	0.864965	Down
L1PA6	-0.601545	304.398	0.968167	0.986113	Down
L1M1	-0.550712	253.38	0.968167	0.986377	Down
L1P1	-1.22435	245.586	0.448953	0.683111	Down
L1P2	-1.16452	202.561	0.40319	0.618437	Down
L1PA15	-0.532017	200.025	0.956525	0.977648	Down
L1PREC2	-0.571233	196.025	0.934114	0.965348	Down
L1PB2	-1.09485	182.451	0.41988	0.627959	Down
L1PB3	-1.01152	177.179	0.514503	0.701891	Down
L1M3d	-1.55341	176.198	0.136146	0.314509	Down
L1MDa	-0.542403	172.683	0.928259	0.964026	Down
L1PA14	-0.950952	157.41	0.513897	0.693559	Down
THE1C	-0.962557	149.867	0.460731	0.648591	Down
MER21C	-1.04672	146.641	0.342217	0.533792	Down
HERVH-int	-0.942828	134.809	0.473787	0.63563	Down
MLT1A	-0.902474	130.614	0.455683	0.632853	Down
L1PB	-1.04214	125.442	0.278552	0.448882	Down
L1MCb	-1.00455	121.959	0.299616	0.466737	Down
THE1D	-0.823342	120.863	0.542096	0.696204	Down
MLT1L	-0.858246	117.764	0.46598	0.63444	Down
LTR33	-0.934528	113.129	0.334141	0.497553	Down
MSTB	-0.884302	111.286	0.38798	0.551514	Down
L1M7	-0.84782	105.998	0.416313	0.577966	Down
L1PBa1	-1.16041	102.702	0.152298	0.288718	Down
L1M3f	-1.14289	102.275	0.158355	0.295067	Down
L1MA1	-0.57088	98.6361	0.794064	0.867478	Down
L1MA5A	-0.797397	97.9646	0.447136	0.602169	Down
MLT1H	-0.822272	95.0744	0.383404	0.537098	Down
L1P3	-0.76221	91.4186	0.458577	0.613675	Down
MLT1E1A	-0.940858	91.1365	0.239384	0.379976	Down
L3b	-0.756159	91.1365	0.463961	0.614866	Down
MLT1I	-0.793263	90.8217	0.401036	0.554953	Down
L1P4a	-1.08844	90.4394	0.150952	0.28237	Down
L1M3c	-1.07958	88.6095	0.153039	0.278535	Down
LTR7	-1.01463	84.7542	0.169931	0.295993	Down
MER31B	-1.14023	83.4749	0.116966	0.234361	Down
LTR78B	-1.12396	82.8389	0.124773	0.237138	Down
LTR8	-0.997263	82.8162	0.173363	0.299299	Down
L1ME3D	-0.752816	82.1126	0.409314	0.55416	Down
L1M4b	-0.670043	79.9746	0.550441	0.682185	Down
MER74A	-1.02865	79.7971	0.154317	0.269541	Down
L1ME3E	-0.707341	75.948	0.438859	0.581669	Down
MLT1A1	-0.72927	75.5577	0.390672	0.530882	Down
MSTD	-0.71101	73.3137	0.409853	0.548208	Down
L1M4a2	-0.816712	72.6924	0.264957	0.392673	Down
MLT1J2	-0.792671	71.8007	0.283465	0.412512	Down
MLT1F	-0.794312	70.1469	0.270341	0.396376	Down
MamSINE1	-0.730419	69.9988	0.352985	0.488163	Down
L1MD3	-0.664212	67.9947	0.451242	0.588414	Down
LTR16C	-0.845378	67.9633	0.213877	0.33276	Down
L1M6	-0.656266	67.4243	0.462817	0.599259	Down
L1M4a1	-0.68295	66.562	0.400633	0.532998	Down
MER4D1	-0.964797	66.1223	0.139781	0.245602	Down
L1M3e	-1.08667	65.9086	0.10142	0.197461	Down
MLT2D	-0.848674	65.5484	0.200552	0.316889	Down
L1MEh	-0.754404	64.1443	0.278081	0.397963	Down
MLT1N2	-0.834926	63.3716	0.200686	0.31107	Down
LTR86A1	-1.32206	63.0127	0.0576082	0.133051	Down
MLT1G3	-0.872482	62.6215	0.172959	0.282106	Down
MLT1F2	-0.707979	62.5863	0.324383	0.451131	Down
MLT2A1	-0.997784	61.8529	0.118043	0.213199	Down
HAL1b	-0.651109	61.5775	0.410929	0.541066	Down
L1P4d	-1.28847	60.472	0.0595599	0.133712	Down
LTR78	-0.860438	58.8432	0.165556	0.269541	Down
MER21B	-0.771409	58.7809	0.227943	0.341357	Down
L1PA15-16	-0.90437	57.8582	0.141732	0.240048	Down
MLT1F1	-0.818769	57.2288	0.183256	0.287925	Down
MER4D	-0.970987	56.8225	0.114543	0.203148	Down
MSTA-int	-0.863919	54.3965	0.147453	0.243354	Down
LTR16A2	-1.07799	53.9436	0.0825089	0.158577	Down
L1MEj	-0.720404	53.5184	0.246921	0.354583	Down
L1M2c	-0.999949	53.2648	0.0984588	0.180399	Down
THE1B-int	-0.732472	53.1291	0.230231	0.337654	Down
LTR79	-0.806435	52.9794	0.172488	0.270202	Down
L1M8	-0.606387	52.353	0.404469	0.522418	Down
MSTB1	-0.652855	51.319	0.307087	0.418066	Down
LTR67B	-0.816414	50.2494	0.156336	0.248512	Down
ERVL-E-int	-0.628688	50.2005	0.340265	0.454437	Down
HERVP71A-int	-1.39892	49.7033	0.0394374	0.09549	Down
MER66B	-1.03874	48.3424	0.0788748	0.151435	Down
MER77	-0.967185	47.8975	0.0938825	0.17048	Down
MER41E	-1.2283	47.7044	0.0510129	0.111229	Down
MER39	-0.718305	47.6087	0.209637	0.305912	Down
HAL1M8	-0.612958	47.606	0.335891	0.445047	Down
THE1C-int	-1.09028	47.1804	0.0682415	0.135432	Down
MamGypLTR3	-1.32497	45.7182	0.0398412	0.0946965	Down
MER41-int	-0.684677	45.2319	0.223097	0.324825	Down
LTR16A	-0.79457	45.0566	0.143213	0.230393	Down
MLT1J1	-0.644714	44.8169	0.262198	0.36146	Down
L1ME3C	-0.560594	44.5339	0.395114	0.506282	Down
LTR8B	-0.90775	43.9538	0.100074	0.173258	Down
L1ME5	-0.655195	43.862	0.240864	0.340167	Down
MER61-int	-0.714978	43.6272	0.186688	0.281312	Down
MER57-int	-0.870392	40.2403	0.0983915	0.170348	Down
MLT1G1	-0.702079	39.9706	0.174642	0.259357	Down
MLT1O	-0.634519	39.0884	0.222559	0.311996	Down
L1P4	-0.534858	38.8254	0.381654	0.482608	Down
LTR33B	-1.00605	38.5059	0.0654149	0.12419	Down
MLT2B3	-0.83443	38.4405	0.103574	0.17458	Down
LTR40a	-0.770044	37.8062	0.128272	0.199974	Down
LTR10D	-1.11965	37.6057	0.0483882	0.100119	Down
MER34B	-0.93881	37.1495	0.0742311	0.133977	Down
THE1A	-0.603522	36.932	0.241806	0.330512	Down
MSTB2	-0.789345	36.6594	0.113601	0.183177	Down
MLT2C1	-0.786265	35.9106	0.112457	0.180664	Down
LTR49-int	-0.566175	35.9009	0.27761	0.373628	Down
MLT1G	-0.747929	35.3713	0.123831	0.196535	Down
LTR36	-0.962417	34.2964	0.0635978	0.118371	Down
MLT1-int	-1.05933	33.7885	0.0500034	0.0977384	Down
MER89	-0.904631	33.3729	0.0714718	0.128158	Down
LTR37B	-0.801653	32.8053	0.094892	0.157254	Down
THE1A-int	-0.82232	32.7105	0.0874891	0.148922	Down
MER4A1	-0.714264	32.7013	0.126657	0.197064	Down
HERVL-int	-0.66771	31.7504	0.14678	0.21849	Down
MER49	-0.788142	31.4784	0.0941517	0.15527	Down
L1MEa	-1.04995	31.365	0.0469076	0.0915223	Down
MER21A	-0.702886	31.144	0.126253	0.192567	Down
LTR31	-0.922251	31.0716	0.0640016	0.114138	Down
MSTD-int	-0.965671	30.8602	0.0548489	0.104748	Down
THE1D-int	-0.654361	30.5515	0.148597	0.216506	Down
LTR7B	-0.724186	29.843	0.109294	0.172596	Down
ERVL-B4-int	-0.585102	29.772	0.193755	0.274302	Down
HERVK11-int	-0.934496	29.4736	0.0574063	0.10488	Down
MER52C	-1.20173	29.3307	0.0310923	0.0690385	Down
HERVS71-int	-0.783944	29.2259	0.0882294	0.144293	Down
LTR48B	-0.750386	29.058	0.096911	0.155535	Down
LTR48	-0.735193	28.8969	0.101622	0.16109	Down
MLT2B4	-0.563972	28.8953	0.20782	0.282635	Down
LTR33A	-0.763252	28.8437	0.0922	0.148922	Down
L1M3de	-0.836778	28.7791	0.0725486	0.125909	Down
MLT2B2	-0.870052	28.5436	0.0646073	0.115725	Down
L1M3b	-0.939219	28.5158	0.0554546	0.100251	Down
MER4E1	-0.678619	28.0709	0.121004	0.181457	Down
LOR1-int	-0.608416	27.3458	0.155125	0.223515	Down
LTR14B	-0.908835	27.1169	0.0570698	0.0999868	Down
PRIMA41-int	-1.14769	26.7458	0.0316307	0.0670546	Down
L1MCc	-0.500408	26.6867	0.265967	0.339902	Down
LTR49	-0.704992	26.507	0.10142	0.157519	Down
MER11A	-0.772131	26.495	0.0817686	0.132654	Down
MER72	-0.939655	26.227	0.0495996	0.0909933	Down
MER68B	-0.773674	25.7735	0.0772596	0.127364	Down
MLT1B-int	-0.917077	25.6906	0.0510802	0.0927126	Down
MER4B	-0.697144	25.5458	0.101353	0.154609	Down
MER50	-0.593773	25.5341	0.15176	0.21558	Down
MLT1H1	-0.613599	25.497	0.137358	0.201693	Down
MLT-int	-1.12399	25.4032	0.0313615	0.0655998	Down
MER39B	-0.760622	25.2532	0.0798169	0.128554	Down
AmnSINE1	-0.600011	24.9989	0.14254	0.203941	Down
LTR25-int	-0.724688	24.787	0.0874218	0.139267	Down
MER77B	-0.619334	24.4875	0.127936	0.18569	Down
LTR87	-0.836117	24.2254	0.0603675	0.103425	Down
LTR41B	-0.921262	24.1566	0.0477825	0.0859675	Down
MER41B	-0.511379	23.9121	0.207686	0.277741	Down
MER57B1	-0.749448	23.8919	0.077125	0.124719	Down
HERVK-int	-0.669786	23.8516	0.102362	0.154741	Down
LOR1b	-0.629438	23.6428	0.11811	0.172464	Down
L1M3a	-0.78267	23.6416	0.0685107	0.113609	Down
MLT2C2	-0.74463	23.4931	0.0761155	0.123396	Down
LTR50	-0.637614	23.4931	0.114476	0.168099	Down
MER51A	-0.617281	23.2945	0.123023	0.177225	Down
LTR24C	-0.815686	23.2729	0.0606367	0.102103	Down
MER51C	-1.18862	23.0756	0.0243623	0.0544901	Down
MLT1A0-int	-0.591435	22.7966	0.130763	0.187409	Down
LTR1F2	-1.17352	22.544	0.025641	0.0547547	Down
L1P3b	-1.26469	22.398	0.0205936	0.0488031	Down
LTR73	-1.23556	22.159	0.021805	0.0491998	Down
MER65A	-0.618879	22.0453	0.11239	0.164925	Down
MLT1H1-int	-1.06967	22.0398	0.0298809	0.061103	Down
LTR16E2	-0.710235	22.0102	0.0799515	0.125248	Down
MLT1E1	-0.776495	21.7048	0.0622518	0.105409	Down
MER4A	-0.644194	21.6758	0.0991318	0.148922	Down
LTR1A2	-0.846835	21.463	0.0505418	0.0875546	Down
MER57A1	-0.609955	21.4543	0.112794	0.164132	Down
LTR53	-0.867905	21.3803	0.0475133	0.0835868	Down
LTR32	-0.654002	21.0151	0.0923346	0.139664	Down
MLT2F	-0.707505	20.8686	0.0756444	0.1189	Down
LTR6B	-0.842453	20.7304	0.0486574	0.0851739	Down
MSTB-int	-0.739786	20.6979	0.0670301	0.108451	Down
MER54A	-0.849843	20.3955	0.047446	0.0823965	Down
MLT1M	-0.529987	20.3561	0.151491	0.207909	Down
LTR16B2	-0.752562	20.2952	0.062521	0.103029	Down
LTR6A	-0.762889	20.1667	0.0601656	0.100648	Down
MER52-int	-1.11845	20.1289	0.0242277	0.051845	Down
MSTC-int	-1.09811	20.0427	0.0253045	0.0530353	Down
LTR15	-0.873649	19.7506	0.0430042	0.0756514	Down
HERVIP10F-int	-0.800374	19.6948	0.0524934	0.0884804	Down
HUERS-P3b-int	-0.640557	19.4883	0.0873545	0.134242	Down
MSTB1-int	-1.18693	19.4498	0.020459	0.0456289	Down
LTR57-int	-0.838176	19.281	0.0452924	0.0792223	Down
Harlequin-int	-0.54952	19.1239	0.126994	0.182119	Down
LTR7Y	-1.03527	18.8944	0.026987	0.0548869	Down
MER34A	-0.581208	18.8021	0.10889	0.155667	Down
LTR37A	-0.51498	18.5209	0.144424	0.19799	Down
HUERS-P3-int	-0.795901	18.4085	0.049465	0.0823965	Down
LTR82B	-0.649677	18.1425	0.0784037	0.119958	Down
LTR18B	-1.56549	18.0245	0.00982569	0.0285676	Down
MamGypLTR1c	-0.773025	17.9956	0.0510129	0.0847771	Down
LTR84b	-0.751055	17.9295	0.0551181	0.0901997	Down
LTR10F	-0.935142	17.9162	0.0326402	0.0609708	Down
LTR23	-0.675676	17.617	0.0683088	0.106996	Down
MER57B2	-0.638065	17.6023	0.0793459	0.119296	Down
LTR85a	-0.654308	17.5265	0.0732889	0.112816	Down
LTR16B	-0.849286	17.3552	0.0397066	0.0689062	Down
LTR46	-0.896555	17.1617	0.0345918	0.0624256	Down
MER67B	-0.804374	17.0513	0.0438791	0.0748578	Down
MLT1I-int	-0.862255	17.0313	0.0370819	0.0661288	Down
LTR8A	-0.666127	17.0021	0.0681742	0.105674	Down
MER4E	-0.544387	16.9456	0.110775	0.155932	Down
LTR71B	-1.26174	16.7926	0.0153442	0.0355773	Down
MLT1E3	-0.605015	16.7737	0.0850663	0.125512	Down
MER11B	-0.710628	16.6435	0.0576755	0.0904642	Down
MER52A	-0.580645	16.5871	0.0916616	0.134771	Down
L5	-0.67743	16.509	0.0643381	0.099061	Down
LTR35	-0.893748	16.5009	0.0327747	0.0601772	Down
MER4CL34	-0.727503	16.1405	0.0522242	0.0837191	Down
MER92-int	-0.576452	16.1167	0.0911905	0.132125	Down
MLT1A1-int	-0.860845	15.9861	0.0349283	0.0614998	Down
MER67D	-0.554247	15.8606	0.0989972	0.140854	Down
L1M	-0.746109	15.7586	0.0483882	0.0777675	Down
LTR26	-0.818227	15.5643	0.0381587	0.0659966	Down
MER34C2	-0.939802	15.461	0.0272562	0.0515805	Down
MSTA1	-0.827021	15.4071	0.0372165	0.0637482	Down
LTR10G	-1.21718	15.2929	0.0144693	0.0342547	Down
LTR47A2	-1.07086	15.2557	0.0200552	0.0411321	Down
LTR34	-1.1597	15.1633	0.016421	0.0363709	Down
MLT1F-int	-0.769374	15.1616	0.0425331	0.0708901	Down
MER31A	-0.561675	15.0932	0.0893734	0.128819	Down
HERVIP10FH-int	-0.540503	15.0573	0.0977186	0.139003	Down
MER92B	-0.650001	15.0104	0.0622518	0.0965481	Down
LTR16E1	-0.616948	14.9713	0.0701258	0.106203	Down
HERV9-int	-1.4507	14.9611	0.0096238	0.0259225	Down
LTR16D	-0.869205	14.9486	0.0319672	0.0568708	Down
HERVE-int	-0.913028	14.9448	0.0277946	0.0522418	Down
MamGypLTR1a	-0.621457	14.8894	0.0694529	0.103161	Down
MLT1J1-int	-0.730047	14.8643	0.0469749	0.0759159	Down
MER41C	-0.64009	14.8643	0.0640689	0.0981352	Down
LTR16A1	-0.601894	14.7805	0.0745676	0.109774	Down
MamRep1527	-0.684195	14.7758	0.0545124	0.0850417	Down
MER70B	-0.819802	14.6841	0.0349956	0.0614998	Down
LTR41	-0.560175	14.6841	0.0865469	0.124983	Down
MLT1J-int	-0.647077	14.6457	0.0615788	0.0942997	Down
LTR9D	-0.684013	14.3573	0.0529645	0.0819997	Down
LTR88b	-0.89246	14.351	0.0284003	0.0515805	Down
MER65C	-0.753594	13.8065	0.0405142	0.0661288	Down
MLT1F2-int	-0.774408	13.7368	0.0376876	0.0628224	Down
LTR81A	-0.694546	13.4703	0.0473114	0.0744611	Down
MER11C	-0.513603	13.4031	0.0949593	0.134638	Down
LTR54	-0.531513	13.369	0.0882294	0.124322	Down
LTR76	-0.887912	13.3192	0.0261794	0.048274	Down
MamGypLTR2b	-1.05072	13.2606	0.0180362	0.0365031	Down
LTR9	-0.560333	13.2566	0.0770577	0.111493	Down
MER66C	-0.807497	13.1101	0.0327075	0.0552837	Down
MLT1C-int	-0.652566	12.911	0.0525607	0.0792223	Down
MamGypLTR1b	-0.559163	12.7852	0.0743657	0.1066	Down
LTR68	-0.892925	12.582	0.0247661	0.0447031	Down
MER66-int	-0.60442	12.0155	0.0574063	0.0847771	Down
MLT1A-int	-0.677431	11.9255	0.0436099	0.0681127	Down
LTR75B	-0.946298	11.8832	0.0200552	0.038487	Down
MER70A	-0.730504	11.7162	0.0356013	0.0585901	Down
MER57F	-0.812688	11.4455	0.0275927	0.0473482	Down
L1P4e	-0.850198	11.4263	0.0244296	0.0440418	Down
LTR1F1	-0.768087	11.3757	0.0309577	0.0521095	Down
MER51-int	-0.609306	11.3757	0.0530318	0.078561	Down
LTR56	-0.538297	11.3484	0.0709334	0.100384	Down
MER34-int	-0.743138	11.2613	0.0329766	0.0543579	Down
MER57E1	-0.551575	11.2508	0.0648092	0.0956223	Down
PrimLTR79	-0.553651	11.2269	0.0653476	0.0928449	Down
LTR55	-0.988079	11.1855	0.0173632	0.0334612	Down
LTR10C	-0.508029	11.1691	0.080961	0.110038	Down
MER52D	-0.870519	11.1544	0.0232856	0.0409999	Down
LTR16D2	-1.16671	11.0519	0.0117101	0.0255257	Down
LTR64	-0.758085	11.0372	0.031025	0.0514482	Down
MLT1H2-int	-0.61845	10.9932	0.0481863	0.0743288	Down
MLT1H-int	-0.606472	10.992	0.0513494	0.0760481	Down
LTR40b	-0.586982	10.9889	0.0553873	0.0819997	Down
MER51B	-0.685937	10.9066	0.0378895	0.0604417	Down
LTR19B	-0.82065	10.7625	0.0250353	0.0435128	Down
MLT1J2-int	-0.72782	10.5744	0.0319672	0.0525063	Down
LTR12B	-0.826083	10.5473	0.0242277	0.0421902	Down
MST-int	-1.09128	10.4975	0.0128542	0.026716	Down
HERVFH19-int	-1.14105	10.4438	0.0113736	0.0248644	Down
LTR84a	-0.545058	10.34	0.0617807	0.0878191	Down
LTR54B	-0.516025	10.3355	0.068578	0.0978707	Down
PRIMA4-int	-0.594034	10.2911	0.0495996	0.0736675	Down
MER89-int	-0.62657	10.2213	0.0435426	0.0662611	Down
LTR22A	-1.27041	10.1228	0.00854701	0.0206322	Down
LTR41C	-0.579318	9.98966	0.0516185	0.0741965	Down
LTR2C	-0.709573	9.71563	0.0309577	0.0501256	Down
LTR90B	-0.668952	9.66869	0.0351975	0.0551514	Down
LTR89	-0.628745	9.56933	0.0405815	0.0609708	Down
MER66A	-0.953614	9.55179	0.0156807	0.029758	Down
LTR38	-0.849087	9.53705	0.0200552	0.0361063	Down
LTR91	-0.841282	9.46594	0.0203917	0.0362386	Down
MER83A-int	-1.0614	9.45598	0.011912	0.0249967	Down
LTR12	-0.605576	9.42053	0.0426677	0.0640127	Down
MamGypLTR2c	-0.677949	9.33423	0.0330439	0.0517127	Down
LTR26E	-0.966505	9.2208	0.0147385	0.0280386	Down
LTR65	-0.657225	9.04317	0.0345245	0.0526385	Down
HERV9NC-int	-0.85488	8.95135	0.0187092	0.0331967	Down
LTR22B	-0.981377	8.78997	0.0133926	0.0260548	Down
MLT1E	-0.640402	8.71511	0.0350629	0.0532998	Down
MER70C	-0.892081	8.69131	0.0162864	0.0300225	Down
MER61B	-0.537186	8.63376	0.0509456	0.0727417	Down
MER50B	-0.533537	8.49637	0.0508783	0.0724772	Down
MER110A	-0.62287	8.34789	0.0349283	0.0532998	Down
MER68-int	-0.625778	8.34666	0.0347937	0.0526385	Down
MER9a2	-0.649525	8.26275	0.0312942	0.0489353	Down
MER110	-0.640699	8.21087	0.0323037	0.0497289	Down
L1P5	-0.538756	8.17151	0.0476479	0.0677159	Down
LTR38B	-0.859984	8.03715	0.0162864	0.0292289	Down
MER76	-0.618174	8.00343	0.0338515	0.051316	Down
HERV16-int	-0.524168	8.00343	0.0498688	0.069303	Down
LTR16B1	-0.508198	7.91116	0.0522915	0.0731385	Down
MLT1K-int	-1.14353	7.75389	0.00821051	0.017987	Down
LTR19A	-0.591722	7.74773	0.0366108	0.0532998	Down
LTR10E	-0.731451	7.72504	0.022478	0.0366354	Down
MER92D	-0.864712	7.69571	0.0154115	0.0275096	Down
LTR13A	-0.628819	7.67118	0.0308904	0.0478773	Down
LTR71A	-0.781617	7.58233	0.0187765	0.0321386	Down
HERVK9-int	-0.5207	7.45	0.0462346	0.0650708	Down
LTR25	-0.780454	7.39832	0.0181035	0.0314773	Down
MER50-int	-0.527504	7.30579	0.0444848	0.0621611	Down
LTR83	-0.575002	7.23689	0.035534	0.0525063	Down
LTR45C	-0.561272	7.2319	0.0378895	0.0546224	Down
HERVL74-int	-0.608077	7.22123	0.0315634	0.0474805	Down
HERVIP10B3-int	-0.621796	7.1591	0.0295444	0.0448353	Down
LTR27C	-1.02962	7.12218	0.0095565	0.0191774	Down
LTR51	-0.752401	7.08378	0.019113	0.0317418	Down
LTR88c	-0.66931	6.9808	0.0243623	0.0382225	Down
HERVK14-int	-0.706313	6.97089	0.0220069	0.0347838	Down
LTR75	-0.739686	6.94781	0.0193822	0.0321386	Down
MER61E	-0.730464	6.93331	0.019786	0.0326676	Down
LTR19-int	-0.654921	6.92311	0.0254391	0.0394128	Down
LTR26B	-0.952347	6.92024	0.0109698	0.021029	Down
MER92C	-1.10123	6.78212	0.00767212	0.0163999	Down
LTR72	-0.727825	6.69006	0.019113	0.0316096	Down
MER51E	-0.686158	6.6095	0.0218723	0.0345192	Down
MamGypLTR1d	-0.54371	6.50453	0.0353321	0.0514482	Down
MER61A	-0.514069	6.49066	0.0401777	0.057003	Down
LTR28B	-0.857268	6.49049	0.0129215	0.0231451	Down
LTR28C	-0.702168	6.41795	0.0198533	0.0320063	Down
MLT1G1-int	-0.72182	6.24143	0.0183727	0.0294935	Down
LTR42	-0.566623	6.10527	0.0305539	0.0443063	Down
LTR38A1	-1.04143	6.10048	0.00780672	0.0158709	Down
LTR1B1	-0.942458	6.03075	0.0094892	0.0183838	Down
LTR10B2	-0.883562	5.95585	0.0110371	0.0199709	Down
LTR40c	-0.585395	5.93407	0.0273235	0.0403386	Down
MER34D	-0.605844	5.85287	0.0247661	0.0374289	Down
LTR38C	-0.91538	5.71579	0.0096911	0.0181193	Down
LTR81C	-0.631185	5.57307	0.0212666	0.0329322	Down
MER41G	-0.951042	5.19729	0.00794132	0.0153419	Down
LTR45B	-0.550729	5.16161	0.026987	0.0383547	Down
LTR2752	-1.1006	5.01417	0.00551854	0.0117709	Down
HERVK3-int	-0.593446	5.00078	0.0217377	0.0326676	Down
MER70-int	-0.701953	4.88454	0.0144693	0.0235419	Down
MER83C	-0.836938	4.77016	0.0095565	0.0170612	Down
LTR24	-0.52081	4.75354	0.026987	0.039016	Down
THE1-int	-0.97235	4.45869	0.00639343	0.0124322	Down
LTR44	-0.561069	3.99794	0.0189111	0.0277741	Down
MLT2B5	-0.810999	3.93087	0.00834511	0.0144161	Down
LTR1E	-0.699307	3.84364	0.0111717	0.017987	Down
MER57C1	-0.700196	3.80931	0.0111044	0.0177225	Down
MER84	-0.530639	3.73015	0.0198533	0.0283031	Down
MER65B	-0.739696	3.68057	0.0091527	0.0157387	Down
L1M2a1	-0.637974	3.63516	0.0127196	0.0198386	Down
MER11D	-0.565421	3.62831	0.0166229	0.0244677	Down
LTR28	-0.776575	3.61107	0.00827781	0.0140193	Down
LTR60	-0.810052	3.55278	0.00740292	0.012829	Down
LTR18C	-2.97842	3.52751	0.000336496	0.0025129	Down
LTR9C	-0.62912	3.48761	0.0127196	0.0191774	Down
LTR27D	-0.547154	3.41951	0.0168248	0.0240709	Down
HERVI-int	-0.577143	3.35022	0.0143347	0.0214257	Down
MER87	-0.680979	3.32817	0.0100949	0.0158709	Down
MER57C2	-0.520034	3.27714	0.0174978	0.0252612	Down
MER48	-0.509649	3.27714	0.0185073	0.026187	Down
LTR16D1	-0.671006	3.14728	0.0095565	0.0153419	Down
MLT2E	-0.596762	3.04304	0.0119793	0.017987	Down
LTR43-int	-0.632334	3.03525	0.0104314	0.0162677	Down
MER61D	-0.520617	3.03368	0.0160172	0.0228806	Down
LTR52-int	-0.685529	2.83745	0.00814321	0.0130935	Down
HUERS-P2-int	-0.681088	2.82542	0.00814321	0.0132258	Down
LTR27E	-0.611481	2.67452	0.0096911	0.0148129	Down
LTR22B1	-0.706565	2.62852	0.00679723	0.0113742	Down
LTR19C	-0.761298	2.44881	0.00531664	0.00925803	Down
MER51D	-0.65177	2.30877	0.00713372	0.0111096	Down
HERVK13-int	-0.782391	2.21436	0.00450905	0.0078032	Down
L1PA4	-0.496721	307.653	0.995558	0.998281	NotSig
AluY	0.265225	307.653	1	1	NotSig
AluSc	0.228016	271.341	0.999529	0.999206	NotSig
AluSx	0.14671	243.265	0.999865	0.999735	NotSig
AluSx1	0.128764	240.98	1	1	NotSig
AluSg	0.210336	231.647	0.999731	0.999206	NotSig
L1PA16	-0.399002	211.226	0.990645	0.994048	NotSig
AluSc8	0.245393	202.511	0.99926	0.99881	NotSig
AluSx3	0.196917	189.417	0.999596	0.999206	NotSig
L1PA3	-0.331253	188.85	0.996702	0.998148	NotSig
HAL1	-0.301898	182.596	0.997039	0.997884	NotSig
AluSp	0.158237	179.909	0.999865	0.999471	NotSig
MIR	-0.161183	161.025	0.999798	0.999868	NotSig
L2	-0.233301	154.039	0.998721	0.998677	NotSig
AluSq2	0.1383	152.422	0.999933	0.999339	NotSig
AluSz	0.111671	145.67	0.999933	0.999735	NotSig
MIR3	-0.235892	123.881	0.997981	0.998677	NotSig
L1MA2	-0.417644	121.37	0.956794	0.972755	NotSig
L1MA9	-0.319935	114.331	0.986271	0.991271	NotSig
L1PA8	-0.388012	114.255	0.963928	0.976194	NotSig
L2a	-0.112439	107.431	0.999865	0.999735	NotSig
L1MCa	-0.382028	103.92	0.954775	0.97421	NotSig
L2c	-0.134311	99.3227	0.999462	0.999603	NotSig
L1MB3	-0.254979	96.6452	0.993337	0.994974	NotSig
L2b	-0.169038	90.9268	0.999327	0.998281	NotSig
L1MC3	-0.354289	89.0981	0.959553	0.9713	NotSig
AluSg7	0.313394	87.031	0.983242	0.975532	NotSig
AluSx4	0.236241	80.0498	0.994347	0.992329	NotSig
AluSq	0.162964	78.344	0.998721	0.998545	NotSig
AluYj4	0.484742	71.5824	0.872266	0.795265	NotSig
FRAM	0.481285	71.1717	0.872468	0.79262	NotSig
L1PA13	-0.343223	67.1931	0.937614	0.954503	NotSig
AluJo	0.0872558	65.1246	0.999664	0.999471	NotSig
MIRb	-0.101524	64.2909	0.999798	0.999339	NotSig
L1MA7	-0.34623	56.9139	0.911165	0.931887	NotSig
AluSg4	0.264857	52.9876	0.976041	0.965216	NotSig
AluYm1	0.308718	52.3137	0.957871	0.934929	NotSig
L1MB8	0.202926	47.7386	0.993472	0.985187	NotSig
MIRc	-0.127434	45.5147	0.998721	0.998942	NotSig
AluSc5	0.251486	45.4174	0.974561	0.961513	NotSig
L1MEd	-0.165512	44.749	0.99502	0.996165	NotSig
L1MB1	-0.321081	44.5367	0.89286	0.916413	NotSig
AluSz6	0.0815173	43.5354	0.999731	0.999206	NotSig
AluYf1	0.440597	43.04	0.742984	0.671075	NotSig
AluJb	0.0554574	39.283	0.999933	0.999603	NotSig
L1MC5	0.205108	37.6877	0.9858	0.972755	NotSig
L1ME2z	0.387279	37.6358	0.792853	0.727549	NotSig
L1MA5	-0.360534	37.2689	0.784912	0.832165	NotSig
L1PB4	-0.295008	35.3785	0.875294	0.904907	NotSig
L3	-0.138165	34.78	0.996299	0.996165	NotSig
MamRTE1	-0.445543	31.0221	0.470085	0.567385	NotSig
L1MA8	-0.228894	29.5168	0.94044	0.94842	NotSig
AluJr	0.0533198	28.8304	0.999865	0.999603	NotSig
L1MC5a	0.186916	28.4741	0.9823	0.96839	NotSig
L1MC1	-0.156259	27.8705	0.989098	0.987832	NotSig
L1M4	-0.121814	27.7465	0.997981	0.996297	NotSig
AluYk11	-0.49689	25.8848	0.251969	0.326147	NotSig
MER4-int	-0.431321	25.3498	0.38475	0.476127	NotSig
L1MD2	-0.158567	23.8734	0.980079	0.982939	NotSig
L1M2	-0.194049	23.6034	0.949795	0.956355	NotSig
MLT1B	-0.261929	22.4328	0.822128	0.852004	NotSig
MER41A	-0.492159	22.1358	0.209839	0.274831	NotSig
AluYe5	0.377796	20.674	0.46174	0.432879	NotSig
MLT1H2	-0.440241	20.0898	0.248671	0.31398	NotSig
L1MEf	-0.141679	19.3402	0.982031	0.982542	NotSig
L1MA6	-0.249742	19.2849	0.813917	0.842746	NotSig
L1MD1	-0.188224	18.8662	0.93223	0.934532	NotSig
MLT1A0	-0.214208	18.7229	0.883774	0.895781	NotSig
MER101-int	-0.415516	18.1536	0.25318	0.31927	NotSig
L1MA4A	-0.210743	18.1536	0.880409	0.897765	NotSig
MSTA	-0.209557	18.0607	0.881217	0.89512	NotSig
L1MB4	-0.16762	17.5601	0.954506	0.950932	NotSig
MLT1E2	-0.403887	16.6571	0.242345	0.30406	NotSig
AluYg6	0.380455	16.0332	0.304798	0.266367	NotSig
L1MEg1	-0.498727	15.8206	0.129147	0.174316	NotSig
MLT1J	-0.228271	15.7775	0.80214	0.827272	NotSig
MLT2A2	-0.430488	15.2056	0.181035	0.228806	NotSig
MER31-int	-0.452529	15.0081	0.152231	0.20328	NotSig
L1MEg	-0.133654	14.9713	0.976714	0.97421	NotSig
AluSq10	-0.319672	14.837	0.407564	0.480492	NotSig
MLT1K	-0.217993	14.4366	0.806716	0.826478	NotSig
MER67C	-0.443449	12.8932	0.133051	0.174712	NotSig
L1ME2	-0.136726	12.7044	0.959082	0.959132	NotSig
MER65-int	-0.405508	12.6034	0.160441	0.208438	NotSig
Alu	-0.291707	11.9242	0.387913	0.449808	NotSig
L1MEi	-0.247623	11.6449	0.590147	0.638672	NotSig
L1ME3A	0.121584	10.8604	0.973686	0.958471	NotSig
MamGypsy2-I	-0.387388	10.802	0.147722	0.188996	NotSig
L1PA2	0.111707	10.5193	0.983108	0.97249	NotSig
MER34	-0.44247	10.4947	0.102699	0.135564	NotSig
MER74B	-0.437816	10.3187	0.103641	0.135564	NotSig
AluYk4	-0.26256	10.2843	0.412275	0.47745	NotSig
LTR16	-0.456691	10.016	0.0900464	0.120751	NotSig
L1MA4	-0.113932	10.0044	0.969648	0.967597	NotSig
AluYk3	-0.254585	9.94682	0.434551	0.498347	NotSig
MLT1D	-0.14221	9.8777	0.912511	0.915884	NotSig
LTR2	-0.486205	9.79812	0.0742311	0.105145	NotSig
MLT1C	-0.138856	9.59154	0.913049	0.922233	NotSig
MER90a	-0.393019	9.52391	0.122821	0.156064	NotSig
LTR12C	-0.3465	9.39501	0.164749	0.204603	NotSig
MER90	-0.476207	9.21604	0.0730197	0.100251	NotSig
AluYd8	0.337279	8.96418	0.188034	0.158445	NotSig
L1MD	0.14516	8.5116	0.896292	0.867213	NotSig
MLT2B1	-0.320166	8.48152	0.176391	0.215315	NotSig
LTR82A	-0.465531	8.41642	0.0698567	0.0928449	NotSig
HUERS-P1-int	-0.372422	8.41408	0.118245	0.149716	NotSig
L1ME4b	0.0925164	8.23721	0.983714	0.975665	NotSig
L1MEg2	-0.480426	8.14029	0.0611077	0.0855707	NotSig
AluSq4	0.202972	7.81799	0.59681	0.57585	NotSig
L1ME3Cz	-0.115139	7.77754	0.937142	0.938103	NotSig
L1MDb	-0.346134	7.55878	0.123965	0.152758	NotSig
L1ME3F	-0.169154	7.53421	0.741302	0.768285	NotSig
MER4B-int	-0.342296	7.48138	0.124706	0.156064	NotSig
LTR13	-0.412418	7.40224	0.0776634	0.104748	NotSig
LTR37-int	-0.32146	7.26545	0.142473	0.173654	NotSig
MLT1D-int	-0.390779	6.9991	0.0834511	0.106996	NotSig
MER34B-int	-0.411793	6.85184	0.0704623	0.0958868	NotSig
LOR1a	-0.491396	6.84023	0.0475133	0.0658643	NotSig
HERV17-int	-0.437025	6.60202	0.0605021	0.0808094	NotSig
L1MB5	0.117425	6.48342	0.921125	0.8934	NotSig
MamGypsy2-LTR	-0.42117	6.34991	0.0617134	0.0823965	NotSig
LTR85b	-0.426094	6.13311	0.0574063	0.0763127	NotSig
L1MEb	-0.25354	6.12466	0.20607	0.242164	NotSig
L1ME3G	0.0935983	5.81904	0.958544	0.943658	NotSig
MER9a3	-0.439891	5.80561	0.0498015	0.0674514	NotSig
LTR33C	-0.490058	5.78844	0.0393028	0.0544901	NotSig
LTR24B	-0.437507	5.53949	0.0473787	0.0649385	NotSig
AluYe6	-0.297212	5.35563	0.114207	0.137548	NotSig
AluYi6	0.261014	5.33064	0.171815	0.150509	NotSig
FAM	0.167838	5.25162	0.558786	0.543711	NotSig
L1ME4c	0.13246	5.23442	0.798506	0.766565	NotSig
MER61C	-0.488258	5.2252	0.0349956	0.0488031	NotSig
ERVL-int	-0.419948	5.13544	0.0482536	0.0636159	NotSig
MER68	-0.259164	5.09752	0.149472	0.176828	NotSig
L1M4c	-0.129834	4.90924	0.767279	0.779262	NotSig
MER34A1	-0.379886	4.80122	0.0555219	0.0715514	NotSig
HERV35I-int	-0.258043	4.80122	0.13931	0.165454	NotSig
LTR47A	-0.421109	4.78879	0.0442829	0.0587224	NotSig
L1ME4a	0.0473461	4.54072	0.997779	0.996561	NotSig
L1ME3	0.0992397	4.50896	0.905983	0.881762	NotSig
MER83	-0.433457	4.45857	0.0380241	0.0509192	NotSig
LTR80B	-0.477537	4.44971	0.0307558	0.0420579	NotSig
LTR5A	-0.293669	4.44836	0.0922	0.113477	NotSig
MER21-int	-0.27443	4.31728	0.104247	0.12538	NotSig
MER67A	-0.48328	4.29001	0.0288041	0.0398095	NotSig
LTR1D	-0.447026	4.17389	0.0327075	0.0444386	NotSig
LTR61	-0.451448	4.15497	0.031698	0.0437773	NotSig
THE1B	-0.0790909	4.11928	0.940171	0.947494	NotSig
LTR9B	-0.251691	4.10141	0.119254	0.141516	NotSig
MER110-int	-0.380949	4.06851	0.0452251	0.0587224	NotSig
AmnSINE2	-0.401429	4.05459	0.0401777	0.0525063	NotSig
HERVK22-int	-0.495269	3.88489	0.0241604	0.033858	NotSig
MER65D	-0.464956	3.81605	0.026987	0.0371644	NotSig
LTR62	-0.411842	3.78768	0.0347264	0.0462902	NotSig
LTR1D1	-0.498033	3.77525	0.0226799	0.0322709	NotSig
LTR26C	-0.453995	3.71493	0.0278619	0.0374289	NotSig
LTR43	-0.347857	3.60399	0.047446	0.0604417	NotSig
L1M6B	-0.340053	3.58865	0.0502053	0.0624256	NotSig
MER54B	-0.479929	3.33718	0.0215358	0.029758	NotSig
LTR90A	-0.476048	3.28464	0.0214012	0.0296257	NotSig
MER4C	-0.282231	3.24041	0.0671647	0.081603	NotSig
MER61F	-0.487018	3.22268	0.0197187	0.0279064	NotSig
HERVL40-int	-0.294366	3.19248	0.0594253	0.073403	NotSig
LTR66	-0.476536	3.15103	0.0205263	0.0283031	NotSig
MER73	-0.440134	3.13392	0.0239585	0.0324031	NotSig
LTR40A1	-0.370196	3.04707	0.0334477	0.0435128	NotSig
MLT1G3-int	-0.399174	2.95784	0.0266505	0.0375612	NotSig
LTR88a	-0.47296	2.87585	0.01844	0.0257902	NotSig
AluYk12	-0.311015	2.8526	0.0463692	0.055945	NotSig
LTR3A	-0.472933	2.82704	0.0181035	0.0253935	NotSig
LTR53-int	-0.277399	2.81994	0.0588869	0.0710224	NotSig
AluJr4	-0.0303272	2.77226	0.997914	0.998016	NotSig
LTR86C	-0.431281	2.76695	0.0216031	0.0289644	NotSig
LTR70	-0.320035	2.75541	0.0413891	0.0507869	NotSig
L1M2a	0.156955	2.6752	0.228279	0.220209	NotSig
MER57D	-0.31502	2.65281	0.0404469	0.0502579	NotSig
LTR10A	-0.36814	2.57476	0.0277946	0.0357096	NotSig
MER41D	-0.30136	2.53142	0.0417929	0.0517127	NotSig
L1MA10	-0.111594	2.50513	0.515176	0.575188	NotSig
LTR22C2	-0.366756	2.47625	0.026987	0.0341225	NotSig
L1ME3B	0.0650128	2.40308	0.927115	0.908478	NotSig
MER57A-int	-0.158937	2.31234	0.166297	0.185822	NotSig
MER76-int	0.493771	2.30592	0.0162191	0.0116387	NotSig
MSTC	-0.122845	2.27212	0.330238	0.358418	NotSig
LTR86A2	-0.408859	2.18732	0.0182381	0.0239386	NotSig
LTR2B	-0.371592	2.08016	0.0207955	0.0272451	NotSig
L1M5	0.0206665	2.06707	0.999462	0.999339	NotSig
LTR12F	0.211205	2.01558	0.0771923	0.0670546	NotSig
MSTA1-int	20.103	1.98816	0.000471095	0	NotSig
L1PBb	-0.260228	1.98684	0.0432061	0.0511837	NotSig
LTR9A1	-0.211645	1.95131	0.0652803	0.0778997	NotSig
MLT1E3-int	-0.419654	1.92431	0.0146039	0.0195741	NotSig
L1P	-0.44972	1.92427	0.012585	0.0171935	NotSig
MER4D0	-0.243429	1.86879	0.0452251	0.0542256	NotSig
AluYh3a3	-0.155358	1.8175	0.122552	0.137416	NotSig
AluYk2	0.105912	1.8152	0.351975	0.354318	NotSig
MER57E2	19.9566	1.75885	0.000403796	0	NotSig
LTR14C	19.9105	1.75693	0.000403796	0	NotSig
LTR7C	-0.2879	1.71151	0.028333	0.0346515	NotSig
LTR59	-0.457967	1.69939	0.0106333	0.0141516	NotSig
L1MC	0.0689236	1.69939	0.789757	0.773443	NotSig
MLT1G-int	-0.353446	1.64249	0.0174978	0.022087	NotSig
LTR52	-0.226784	1.62579	0.0445521	0.0519773	NotSig
HERVFH21-int	-0.396641	1.6026	0.0129888	0.0173258	NotSig
MLT1L-int	19.4787	1.51947	0.000336496	0	NotSig
LTR47B3	-0.389559	1.48306	0.0121812	0.0162677	NotSig
LTR86B2	-0.140333	1.46087	0.114611	0.12419	NotSig
LTR35A	1.79517	1.43919	0.00100949	0.000264515	NotSig
LTR17	0.144919	1.42523	0.108217	0.101177	NotSig
LTR81AB	2.34723	1.42491	0.000672993	0.000132258	NotSig
MER9a1	-0.257517	1.31423	0.0257756	0.0306838	NotSig
LTR43B	-0.406387	1.30597	0.0096911	0.0126967	NotSig
MSR1	-0.336796	1.30424	0.0142001	0.0183838	NotSig
MER87B	-0.331011	1.30424	0.0147385	0.0186483	NotSig
HERV15-int	0.407596	1.27836	0.0110371	0.00859675	NotSig
UCON86	19.2837	1.27269	0.000269197	0	NotSig
HERVK14C-int	-1.99325	1.27047	0.000269197	0.00105806	NotSig
LTR23-int	-0.225843	1.22745	0.0312269	0.0358418	NotSig
LTR10B1	-0.35615	1.22162	0.0117774	0.0148129	NotSig
L1M2b	-0.247799	1.19847	0.0245642	0.0292289	NotSig
LTR46-int	-0.162561	1.18568	0.0596945	0.0679804	NotSig
MLT1N2-int	2.18088	1.14922	0.000538394	0.000132258	NotSig
LTR47B2	-0.329573	1.14694	0.0127196	0.0158709	NotSig
MER50C	2.07805	1.14284	0.000605694	0.000132258	NotSig
L1MB2	0.0406755	1.14044	0.927249	0.908478	NotSig
LTR14	-0.316765	1.13842	0.0136618	0.0167967	NotSig
LTR1	1.41965	1.13297	0.00100949	0.000396773	NotSig
LTR21A	-0.339896	1.07291	0.0109025	0.0136225	NotSig
L1MC4	-0.0201501	1.04683	0.996972	0.994313	NotSig
MER57E3	0.194059	1.04231	0.03688	0.0329322	NotSig
LTR5B	0.112386	1.0238	0.11912	0.111493	NotSig
LTR10B	18.8414	1.02363	0.000201898	0	NotSig
L1P4b	18.7334	1.0223	0.000201898	0	NotSig
LTR5	18.9097	1.0223	0.000201898	0	NotSig
LTR3	1.99172	1.01867	0.000538394	0.000132258	NotSig
LTR47B4	1.3202	1.01838	0.00100949	0.000396773	NotSig
HERVKC4-int	1.52129	0.971667	0.000740292	0.000264515	NotSig
LTR14A	1.52291	0.971667	0.000740292	0.000264515	NotSig
L1MB7	-0.0148014	0.865188	0.998654	0.99881	NotSig
AluYh7	-0.157766	0.859208	0.0409853	0.0449676	NotSig
MLT1E2-int	1.43568	0.85207	0.000672993	0.000264515	NotSig
LTR27	1.38479	0.8435	0.000740292	0.000264515	NotSig
L1PA11	-0.0390738	0.824684	0.850057	0.842878	NotSig
LTR12D	0.169953	0.799497	0.0341207	0.0300225	NotSig
MER34C	-0.280336	0.772435	0.0103641	0.0125645	NotSig
LTR39	-0.112761	0.75826	0.0712026	0.0765772	NotSig
LTR1B	-1.08147	0.757404	0.000538394	0.00119032	NotSig
MER101	0.208053	0.75082	0.0203244	0.0178548	NotSig
LTR45	0.994024	0.712602	0.00094219	0.000529031	NotSig
LTR38-int	1.10173	0.709723	0.000807591	0.000396773	NotSig
LTR72B	-0.255593	0.707543	0.0113736	0.0130935	NotSig
L1M3	-0.0337614	0.687193	0.859614	0.849491	NotSig
HERV30-int	1.65605	0.687193	0.000403796	0.000132258	NotSig
LTR53B	1.04819	0.659598	0.000807591	0.000396773	NotSig
LTR1A1	0.149632	0.643365	0.0327075	0.0286999	NotSig
L1MC2	0.0328808	0.631511	0.844875	0.829123	NotSig
HERV3-int	-0.162747	0.611993	0.023151	0.0260548	NotSig
LTR81	1.51821	0.608682	0.000403796	0.000132258	NotSig
LTR26D	-1.02665	0.60625	0.000471095	0.000925803	NotSig
HERVL66-int	1.15118	0.595942	0.000605694	0.000264515	NotSig
LTR60B	-0.187182	0.509842	0.0133253	0.0150774	NotSig
HERV-Fc1-int	1.0286	0.483117	0.000538394	0.000264515	NotSig
LTR57	0.837755	0.459941	0.000740292	0.000396773	NotSig
LTR47B	1.30926	0.458293	0.000336496	0.000132258	NotSig
L1MEc	-0.0115412	0.42925	0.995154	0.992726	NotSig
LTR30	0.936007	0.422252	0.000538394	0.000264515	NotSig
L1ME1	0.00792111	0.394711	0.999529	0.998942	NotSig
AluYh9	-0.142495	0.390702	0.015748	0.0173258	NotSig
MER74C	0.64782	0.374992	0.000874891	0.000529031	NotSig
UCON49	1.19651	0.372661	0.000269197	0.000132258	NotSig
HERVH48-int	0.0696487	0.370804	0.0677704	0.0658643	NotSig
L1MC4a	0.0181537	0.369208	0.932028	0.912842	NotSig
MER66D	-0.120593	0.366958	0.0200552	0.0218225	NotSig
MER95	-0.131767	0.337342	0.0147385	0.0161354	NotSig
LTR22C0	-0.17306	0.332371	0.00821051	0.00912578	NotSig
MamGypLTR3a	0.0468725	0.324527	0.132243	0.128951	NotSig
LTR3B	0.76955	0.310073	0.000471095	0.000264515	NotSig
LTR1C1	-0.897779	0.294733	0.000201898	0.000396773	NotSig
LTR27B	-0.585242	0.294733	0.000538394	0.000793546	NotSig
HERV9N-int	0.0965993	0.278932	0.0213339	0.0203677	NotSig
LTR1B0	0.703663	0.274522	0.000471095	0.000264515	NotSig
LTR12E	-0.0939341	0.255757	0.0189111	0.0202354	NotSig
MER88	0.406335	0.2437	0.00100949	0.000793546	NotSig
MLT1F1-int	-0.101671	0.240471	0.014402	0.0156064	NotSig
LTR39-int	-0.114614	0.234159	0.0109698	0.0116387	NotSig
HAL1ME	-0.0155852	0.223128	0.813244	0.805052	NotSig
LTR21B	-0.480003	0.210816	0.000471095	0.000661288	NotSig
LTR06	0.587854	0.209671	0.000403796	0.000264515	NotSig
LTR81B	-0.0257235	0.1875	0.193418	0.199709	NotSig
L1PA17	-0.0126355	0.155441	0.757723	0.753869	NotSig
MLT1E1A-int	0.650519	0.155441	0.000201898	0.000132258	NotSig
LTR35B	0.339451	0.147508	0.000605694	0.000529031	NotSig
LTR18A	0.544985	0.124092	0.000201898	0.000132258	NotSig
LTR86B1	-0.0403791	0.0977633	0.0222761	0.0223515	NotSig
LTR1C	0.274073	0.0959798	0.000471095	0.000396773	NotSig
MER83B	-0.0488496	0.0921121	0.0131907	0.0136225	NotSig
LTR77	-0.286414	0.0879789	0.000336496	0.000396773	NotSig
MER84-int	0.189144	0.0605015	0.000471095	0.000396773	NotSig
LTR1F	0.108495	0.0452795	0.000874891	0.000793546	NotSig
AluYc3	-0.00666572	0.0408673	0.260381	0.265573	NotSig
LTR4	-0.020858	0.0382949	0.0173632	0.017458	NotSig
LTR69	0.016658	0.0364682	0.024968	0.0247322	NotSig
HERVK11D-int	0.0874047	0.00864306	0.000134599	0.000132258	NotSig
ERVL47-int	0.050678	0.00595333	0.000269197	0.000264515	NotSig
LTR85c	0.00316838	0.00464107	0.0571371	0.0556805	NotSig
MER83B-int	-0.00331406	0.000924651	0.0212666	0.021029	NotSig
LTR22B2	0	0	0	0	NotSig
MLT1O-int	0	0	0	0	NotSig
MER9B	0	0	0	0	NotSig
LTR109A2	0	0	0	0	NotSig
LTR21C	0	0	0	0	NotSig
LTR7A	0	0	0	0	NotSig
L1P4c	0	0	0	0	NotSig
LTR22C	0	0	0	0	NotSig
MLT1E1-int	0	0	0	0	NotSig
MLT1E-int	0	0	0	0	NotSig
LTR22	0	0	0	0	NotSig
LTR1C3	0	0	0	0	NotSig
AluYa5	1.04914	307.653	0.965879	0.896178	Up
AluYb8	1.26945	307.653	0.887678	0.742891	Up
L1HS	0.944134	213.801	0.842385	0.680069	Up
LTR29	1.26511	115.809	0.229625	0.125512	Up
AluYc	0.50409	110.493	0.942863	0.885862	Up
LTR80A	1.57558	65.3511	0.0798169	0.0277741	Up
AluYh3	0.51382	65.1328	0.800121	0.720672	Up
AluYb9	0.739048	44.3079	0.226126	0.156461	Up
MamGyp-int	0.916202	40.6739	0.128878	0.0731385	Up
AluYa8	0.690374	26.7081	0.144424	0.0968126	Up
MSTB2-int	1.33447	12.9398	0.0192476	0.00740643	Up
HERVL32-int	21.962	6.48654	0.00181708	0	Up
MER101B	0.529153	5.63894	0.0411199	0.0284354	Up
MER72B	0.541582	5.37684	0.0374184	0.0255257	Up
LTR22E	21.0517	3.60399	0.00094219	0	Up
MER68C	20.9707	3.36532	0.000874891	0	Up
HERVL18-int	20.8427	3.1433	0.000807591	0	Up
LTR58	20.6499	2.91706	0.000740292	0	Up
PRIMAX-int	20.6171	2.70117	0.000672993	0	Up
MER92A	20.3978	2.47007	0.000605694	0	Up
