# Supplementary material for: Dynamic dysregulation of retrotransposons in neurodegenerative diseases at the single-cell level
Source: HighWire-hosted journal article supplement (doi:10.1101/gr.279363.124), 2024-10-01
Supplement: Supplemental_Table_S6.xlsx [file Supplemental_Table_S6.xlsx]

## Sheet: Sheet1
Supplemental Table S6. Differentially expressed RTEs in multiple sclerosis vs the control identified from excitatory neurons (dataset MS_HS_00002).
Gene	Log2FC	P_adj	AD_PoE	Control_PoE	Exp_trend
L1PA2	-1.15047	271.72	0.460975	0.647479	Down
MLT1K	-0.948986	164.398	0.329257	0.489471	Down
THE1B	-0.885765	156.898	0.439991	0.592477	Down
MamRTE1	-0.921827	138.88	0.251774	0.395608	Down
MLT1J	-0.869479	138.88	0.343712	0.49335	Down
L1P1	-0.962182	137.317	0.208522	0.343932	Down
HAL1ME	-0.854265	134.772	0.343599	0.493419	Down
L1PA8A	-0.88628	133.779	0.288232	0.432876	Down
MLT1I	-0.947871	133.204	0.20973	0.34407	Down
L1MC4a	-0.789039	132.22	0.498302	0.638543	Down
L1MA8	-0.777878	129.5	0.522154	0.6578	Down
MLT1D	-0.786428	123.907	0.425423	0.569133	Down
L1MB1	-0.794261	123.874	0.409949	0.552715	Down
L1MA6	-0.799198	122.114	0.381982	0.526739	Down
L1PA4	-0.650895	120.511	0.725732	0.811305	Down
MLT1L	-0.844982	114.283	0.247245	0.378083	Down
L1ME3	-0.745892	112.334	0.44135	0.581255	Down
L1PA5	-0.63017	112.314	0.715617	0.80514	Down
HERVH-int	-0.791646	109.242	0.338806	0.469036	Down
L1MB4	-0.708933	106.519	0.499962	0.63307	Down
HAL1b	-0.8043	102.466	0.243584	0.36783	Down
L1PA8	-0.692954	101.677	0.489017	0.621848	Down
L1ME3D	-0.765196	92.9992	0.248604	0.369424	Down
L1MCa	-0.664612	92.8245	0.502717	0.623511	Down
L1MEg	-0.608492	92.6782	0.63987	0.750208	Down
L3b	-0.736959	92.4903	0.281665	0.405514	Down
L1MC3	-0.647324	92.2086	0.566236	0.676988	Down
L1M6	-0.732572	91.6479	0.288459	0.413134	Down
L1MC	-0.68254	88.2135	0.377453	0.506027	Down
L1MA10	-0.749128	86.6514	0.231997	0.347049	Down
L1ME3B	-0.640281	85.335	0.495471	0.617346	Down
L1MA2	-0.628524	84.0809	0.52272	0.63688	Down
L1PA10	-0.626068	83.5157	0.51721	0.63404	Down
L1MB2	-0.631221	82.3794	0.471543	0.594625	Down
L1MA4	-0.60471	81.6229	0.560802	0.675395	Down
L1ME3F	-0.656	79.1662	0.34575	0.468343	Down
THE1D	-0.694299	78.9333	0.264229	0.378221	Down
L1P2	-0.782366	78.6132	0.165157	0.261776	Down
L1ME4b	-0.517663	78.4364	0.716335	0.800152	Down
L1MA5	-0.637772	76.9656	0.368093	0.49148	Down
L1M4b	-0.670006	76.4042	0.288345	0.405722	Down
L1ME3G	-0.582558	75.9674	0.568765	0.678374	Down
L1MEf	-0.562849	75.2462	0.617414	0.719313	Down
L1M1	-0.581938	74.777	0.565595	0.669022	Down
L1M8	-0.743316	74.558	0.179461	0.277085	Down
L1PA12	-0.716516	72.1464	0.193539	0.293779	Down
L1MD2	-0.551261	71.3867	0.61013	0.712455	Down
L1PREC2	-0.584577	70.806	0.482639	0.595456	Down
L1MC2	-0.609953	70.6179	0.369867	0.489956	Down
MSTD	-0.704854	70.1205	0.201351	0.298628	Down
L1M3	-0.593962	69.5485	0.4121	0.531657	Down
L1MA1	-0.602757	69.3586	0.379491	0.497853	Down
L1P3	-0.67095	67.8512	0.221203	0.323843	Down
ERVL-E-int	-0.740542	67.6086	0.157345	0.246744	Down
L1ME3Cz	-0.552661	67.2951	0.547743	0.65683	Down
L1MDa	-0.559218	66.2213	0.503057	0.614713	Down
THE1C	-0.65559	64.5326	0.226223	0.324536	Down
L1ME4c	-0.559048	61.2887	0.414629	0.526046	Down
L1PBa	-0.656053	61.1215	0.200068	0.293641	Down
THE1B-int	-0.758839	58.8447	0.118131	0.191119	Down
L1MCb	-0.73073	58.7076	0.129038	0.207329	Down
MSTA-int	-0.860673	58.6351	0.0817104	0.144777	Down
MER4-int	-0.630608	57.2162	0.20856	0.301261	Down
L1PB4	-0.534714	56.7362	0.422441	0.531311	Down
L1M7	-0.606593	56.4551	0.23079	0.327307	Down
L1MA7	-0.515194	56.4551	0.515021	0.619631	Down
L1PA17	-0.557045	56.401	0.336994	0.44389	Down
L1PA11	-0.551273	55.6003	0.341523	0.448462	Down
L1PA6	-0.507237	55.501	0.530155	0.631477	Down
L1ME3E	-0.57269	55.4762	0.285779	0.387919	Down
L1ME3C	-0.620794	55.4302	0.204786	0.295026	Down
L1MEi	-0.558791	55.3126	0.314538	0.419368	Down
MLT1B	-0.541616	54.6293	0.362055	0.467997	Down
L1MB5	-0.512959	53.9909	0.466297	0.573774	Down
MLT1A0	-0.518343	52.0504	0.394588	0.500208	Down
MLT1C	-0.508638	51.4201	0.427197	0.532211	Down
LTR49-int	-0.632147	47.6504	0.153457	0.229357	Down
L1ME2z	-0.504124	47.6504	0.367414	0.470213	Down
MLT1A	-0.548728	46.4533	0.232979	0.323081	Down
MamSINE1	-0.576894	46.2762	0.193576	0.274245	Down
L1P4	-0.56784	45.8969	0.202483	0.285744	Down
HERVS71-int	-1.08452	45.6666	0.0334768	0.0701718	Down
THE1D-int	-0.799177	43.117	0.0673687	0.116099	Down
L1MEj	-0.623033	42.5747	0.132548	0.19867	Down
MLT1J1	-0.636724	42.4434	0.12383	0.188903	Down
Alu	-0.565908	42.4226	0.181726	0.257135	Down
MER57A-int	-0.754978	42.3261	0.0764266	0.128706	Down
MER41-int	-0.636422	41.9886	0.122018	0.185993	Down
HAL1M8	-0.582608	41.9512	0.157986	0.230396	Down
L1MA5A	-0.506553	41.0739	0.254416	0.343239	Down
MLT1M	-0.778005	39.9727	0.0659345	0.112358	Down
HUERS-P3b-int	-0.867647	38.6323	0.0477053	0.0876282	Down
MLT1N2	-0.651702	37.0574	0.0954861	0.148587	Down
MLT1A1	-0.525098	35.6881	0.169799	0.240163	Down
MER41B	-0.630628	34.7797	0.0974109	0.148864	Down
MER4E1	-0.815515	34.7016	0.0490263	0.0873511	Down
MLT1O	-0.649124	34.2878	0.0871075	0.136049	Down
HERVK11-int	-1.17775	33.8591	0.0192482	0.0446107	Down
THE1C-int	-0.942476	33.8591	0.0333258	0.0649764	Down
MER31-int	-0.682374	33.7686	0.0755208	0.12164	Down
MLT1J2	-0.525676	33.3095	0.154929	0.219036	Down
L1M3d	-0.786999	32.1135	0.0478185	0.0843031	Down
L1M3f	-0.673941	30.5608	0.0679725	0.109587	Down
LOR1-int	-0.648743	30.541	0.0762757	0.119839	Down
MLT1A0-int	-0.723261	30.4901	0.056801	0.0941397	Down
AmnSINE1	-0.70151	28.8536	0.0576313	0.094486	Down
MamGypsy2-I	-0.629678	26.6562	0.0687651	0.106955	Down
LTR40a	-0.68887	25.5588	0.0520079	0.0852729	Down
THE1A-int	-0.727881	24.9537	0.0437802	0.0737739	Down
THE1A	-0.533996	24.3862	0.0964674	0.138889	Down
MLT1H2	-0.546484	24.3743	0.0899004	0.130646	Down
LTR37B	-0.663752	23.8618	0.0528004	0.084788	Down
MLT1F	-0.50786	23.4479	0.104091	0.147894	Down
HUERS-P1-int	-0.71814	23.2997	0.0415912	0.0703796	Down
LTR78	-0.525797	22.0928	0.0859375	0.126004	Down
LTR37A	-0.567164	22.0642	0.0711806	0.107093	Down
LOR1b	-0.741323	21.3982	0.0351751	0.0601275	Down
HERVK-int	-0.650336	20.5456	0.0458937	0.0737739	Down
MER92-int	-0.633806	20.3386	0.0485734	0.0777224	Down
LTR85b	-0.844043	20.1429	0.0249094	0.0450956	Down
LTR81B	-0.642132	20.0192	0.0466486	0.0734275	Down
MER65A	-0.646358	19.9736	0.0463466	0.0730119	Down
MER67D	-0.634808	19.8817	0.0475166	0.0752286	Down
L1PBa1	-0.657646	19.7516	0.0438179	0.0703103	Down
MER11C	-0.605218	19.7247	0.0530646	0.0826406	Down
LTR82A	-0.778428	18.5715	0.0268342	0.0471737	Down
L5	-0.709858	18.4754	0.0331371	0.0554863	Down
LTR24C	-0.768009	17.9415	0.0264946	0.046481	Down
LTR6B	-0.815802	17.9341	0.0230223	0.0420477	Down
MLT1B-int	-0.786245	17.6779	0.0249472	0.0439873	Down
MER34A	-0.535131	16.1279	0.0554046	0.0830562	Down
MLT1D-int	-0.642929	16.0718	0.0364206	0.0574952	Down
LTR9B	-0.61203	15.8177	0.0392135	0.0615822	Down
MER57A1	-0.562981	15.7994	0.0484601	0.073289	Down
MER4A	-0.654776	15.5759	0.0327597	0.0533389	Down
MER110-int	-0.664209	15.4109	0.0314764	0.0515378	Down
HERV35I-int	-0.553364	14.8649	0.0460824	0.0702411	Down
MER4A1	-0.539044	14.8019	0.0506492	0.0749515	Down
MSTB-int	-0.669643	14.208	0.0282307	0.0462732	Down
MLT1J1-int	-0.774747	14.0009	0.0198521	0.0351898	Down
L1MEg1	-0.531641	13.9456	0.0482714	0.0719036	Down
LTR16A2	-0.640389	13.6941	0.03008	0.048005	Down
MER66-int	-0.713494	13.1329	0.0225317	0.0380299	Down
MER4E	-0.539669	12.8841	0.0424592	0.0627598	Down
MER110A	-0.751259	12.7019	0.0190972	0.0333195	Down
LTR49	-0.532851	12.6858	0.0423838	0.0632447	Down
MER49	-0.55265	12.6394	0.0400815	0.0599196	Down
MER89	-0.611025	12.6226	0.0304574	0.0483513	Down
MER4B	-0.52027	12.5931	0.0452521	0.0660848	Down
MamRep1527	-0.629166	12.5424	0.028042	0.0451649	Down
MamGypLTR3a	-0.615077	12.5364	0.0299668	0.0467581	Down
MER34B	-0.603695	12.5302	0.0312877	0.0489055	Down
MER51-int	-0.691775	12.5093	0.0227582	0.0379607	Down
HERVK9-int	-0.627625	12.4117	0.0286836	0.0455112	Down
LTR48	-0.574447	12.3391	0.0345335	0.0529925	Down
LTR81A	-0.699393	12.144	0.021324	0.0358825	Down
MER77	-0.507618	11.8195	0.0441576	0.0646301	Down
LTR5A	-0.54925	11.7063	0.0392135	0.0570795	Down
MSTD-int	-0.621329	11.7043	0.0267965	0.0428096	Down
LTR85a	-0.563416	11.6634	0.0336655	0.0512607	Down
MER57B2	-0.522374	10.869	0.0371377	0.0550707	Down
LTR16E2	-0.559142	10.7435	0.0311368	0.0477279	Down
MLT1H2-int	-0.652372	10.5545	0.0213995	0.0347049	Down
LTR57-int	-0.745005	10.5025	0.0163043	0.027847	Down
LTR89	-0.663068	10.4797	0.0207579	0.0339429	Down
HERVK14-int	-0.996912	10.4556	0.00811443	0.0169022	Down
LTR86B2	-0.777972	10.3215	0.0141153	0.0250069	Down
LTR9	-0.589854	10.1215	0.0263436	0.040593	Down
MLT1E3	-0.520486	10.0762	0.0341938	0.0509144	Down
HUERS-P3-int	-0.680855	9.80015	0.0178518	0.0299252	Down
MLT1J-int	-0.543325	9.75106	0.0299668	0.0450956	Down
LTR33A	-0.505311	9.66373	0.0350619	0.05133	Down
MER31A	-0.507431	9.63096	0.0344203	0.0507758	Down
LTR85c	-0.690909	9.56295	0.0170214	0.0282627	Down
MamGypLTR1b	-0.556888	9.50847	0.0271362	0.041632	Down
HERVL74-int	-0.847286	9.39219	0.0104921	0.0196038	Down
LTR80B	-0.77751	9.2021	0.012417	0.0222361	Down
LTR45C	-0.732447	9.17475	0.0142286	0.0245913	Down
MER57D	-0.71013	9.00976	0.0148324	0.0252147	Down
L1P5	-0.620089	8.85228	0.0195501	0.031657	Down
LTR84b	-0.536222	8.67587	0.0266078	0.0405237	Down
MLT1F2-int	-0.69942	8.57445	0.0145682	0.0246606	Down
LTR43	-0.685932	8.53929	0.0159647	0.0263231	Down
LTR73	-0.791591	8.47069	0.0110583	0.019673	Down
MLT1A-int	-0.519927	8.32734	0.0272871	0.04087	Down
LTR54B	-0.514504	8.28523	0.0281552	0.0414935	Down
HERVK3-int	-0.781767	8.19414	0.0108696	0.019673	Down
LTR16B1	-0.578757	8.17413	0.0212485	0.0328346	Down
LTR65	-0.698681	7.94578	0.0137002	0.0228595	Down
MER50-int	-0.613608	7.6148	0.0171347	0.02757	Down
MamGypLTR1c	-0.527609	7.53249	0.0236639	0.0356054	Down
MER61A	-0.607692	7.51846	0.0172856	0.0277778	Down
LTR1F2	-1.62755	7.32565	0.00177385	0.00568024	Down
LTR33C	-0.643512	7.30496	0.0147947	0.0239679	Down
MER41C	-0.547832	7.28242	0.0214372	0.0321419	Down
MER68-int	-0.670994	6.96966	0.0130208	0.0213356	Down
L1M3b	-0.525106	6.80673	0.0212107	0.0322111	Down
LTR10D	-0.510965	6.55784	0.0218901	0.0322804	Down
HERVP71A-int	-0.599205	6.29127	0.014606	0.0231366	Down
L1P3b	-2.12228	6.28212	0.000792572	0.00360211	Down
MER61E	-0.81843	6.09975	0.00732186	0.0130923	Down
PRIMA4-int	-0.515471	6.09521	0.0197011	0.0297174	Down
MLT1C-int	-0.503201	6.05085	0.0206824	0.0305486	Down
MSTC-int	-0.73202	5.92337	0.00860507	0.0151704	Down
LTR1F1	-2.31841	5.86387	0.000603865	0.00304794	Down
MLT1I-int	-0.523991	5.69522	0.017663	0.0263924	Down
LTR64	-0.595698	5.53358	0.0130208	0.020435	Down
PrimLTR79	-0.787674	5.44793	0.006718	0.0121917	Down
MLT1H1-int	-0.631775	5.37407	0.0107941	0.0176642	Down
LTR60B	-2.74417	5.28283	0.000339674	0.00242449	Down
MER50B	-0.501351	5.11799	0.0174743	0.0254918	Down
MLT1F-int	-0.505416	5.05314	0.0168327	0.0246606	Down
LTR88a	-0.659595	4.93983	0.00909571	0.0148933	Down
LTR40A1	-0.551706	4.84612	0.0131341	0.0200194	Down
MER57C2	-0.596138	4.53548	0.0103789	0.0161402	Down
MER61C	-0.540515	4.48809	0.0126057	0.0191189	Down
LTR16B	-0.536654	4.2993	0.0121905	0.0184262	Down
LTR26B	-2.26529	4.24609	0.000452899	0.00221668	Down
LTR25	-0.6496	4.17838	0.00769928	0.0128152	Down
LTR76	-0.568818	4.03547	0.0102657	0.0160017	Down
L1P	-3.55509	3.90903	0.000113225	0.00138543	Down
LTR71B	-1.86863	3.84733	0.000641606	0.00242449	Down
LTR22C2	-2.35725	3.84517	0.000339674	0.00187032	Down
L1M2b	-0.541531	3.34674	0.00875604	0.0138543	Down
MLT1F1-int	-0.637493	3.31489	0.00630284	0.0101829	Down
LTR38-int	-2.00907	3.28895	0.000415157	0.00187032	Down
AluYh9	-2.91898	3.28063	0.000150966	0.00131615	Down
LTR88c	-0.554695	3.1462	0.00792572	0.012261	Down
MER83A-int	-2.17924	3.11538	0.000339674	0.00159324	Down
MLT1K-int	-3.24652	3.04344	0.000113225	0.00110834	Down
LTR38C	-1.92122	3.02318	0.000452899	0.00180105	Down
MER88	-3.66182	2.97353	7.54831e-05	0.00103907	Down
MER70-int	-2.32744	2.96274	0.000301932	0.00152397	Down
MER92D	-0.608538	2.94255	0.00592542	0.00955943	Down
LTR10G	-3.11366	2.84504	0.000113225	0.00110834	Down
MER87B	-2.65479	2.80732	0.000188708	0.00117761	Down
MER84-int	-21.0988	2.79799	0	0.000761984	Down
HERVFH21-int	-2.0318	2.77056	0.000339674	0.00152397	Down
HERV-Fc1-int	-2.02965	2.67388	0.000339674	0.0014547	Down
MER72B	-0.551251	2.64501	0.00649155	0.0100443	Down
LTR52-int	-1.70676	2.53438	0.00049064	0.00166251	Down
MSTB2-int	-2.67726	2.52694	0.000150966	0.00103907	Down
LTR86B1	-0.517354	2.47416	0.0069067	0.01046	Down
MST-int	-0.537422	2.47288	0.0062651	0.00976725	Down
MER70C	-0.524736	2.45849	0.00664251	0.0101829	Down
LTR1B1	-2.09053	2.40146	0.000264191	0.00124688	Down
MER54B	-0.501825	2.39893	0.00724638	0.0105985	Down
LTR1E	-2.89534	2.3564	0.000113225	0.000900526	Down
LTR28B	-1.64496	2.3558	0.00049064	0.00159324	Down
LTR12B	-0.554157	2.30378	0.00592542	0.00872818	Down
ERVL47-int	-1.55844	2.30109	0.000528382	0.00166251	Down
LTR43B	-4.21647	2.29633	3.77415e-05	0.000692713	Down
MLT1E3-int	-1.92997	2.24559	0.000301932	0.00124688	Down
LTR16D2	-2.56746	2.18748	0.000150966	0.000900526	Down
MER57E2	-20.5835	2.13961	0	0.00055417	Down
LTR45	-3.09758	2.13373	7.54831e-05	0.000761984	Down
LTR16D1	-2.10722	2.08994	0.000226449	0.00103907	Down
LTR81AB	-2.79219	2.01943	0.000113225	0.000761984	Down
AluY	0.389639	307.653	0.998377	0.988155	NotSig
AluSz	0.402527	195.403	0.993131	0.973331	NotSig
AluSp	0.368267	137.946	0.98713	0.963979	NotSig
AluSx1	0.287052	126.213	0.995245	0.980119	NotSig
AluSq2	0.312773	102.126	0.987621	0.965295	NotSig
AluSx	0.261218	95.4183	0.994754	0.977625	NotSig
AluJb	0.274541	94.6263	0.993999	0.974716	NotSig
AluSg	0.322262	92.9992	0.980714	0.955597	NotSig
AluJo	0.283629	85.8862	0.989055	0.965919	NotSig
AluSz6	0.283282	73.3636	0.982299	0.95719	NotSig
L1PA3	-0.409235	59.1814	0.81518	0.855362	NotSig
L1MC5	-0.462047	57.6789	0.681877	0.767941	NotSig
L1ME2	-0.497106	56.7362	0.592957	0.689388	NotSig
L3	-0.353623	56.3178	0.86998	0.89637	NotSig
L1ME4a	-0.310366	56.3178	0.920139	0.932876	NotSig
L1MD1	-0.499055	52.4508	0.498981	0.602521	NotSig
L1PA16	-0.440003	51.9359	0.699011	0.775076	NotSig
L1MB3	-0.414278	50.8635	0.734073	0.8023	NotSig
AluSc8	0.277444	50.1746	0.952257	0.929759	NotSig
L1MD	-0.490144	49.9294	0.477959	0.584649	NotSig
L1MA3	-0.418579	49.3241	0.734149	0.794541	NotSig
L1M2	-0.475019	48.8841	0.528268	0.628567	NotSig
AluSc	0.235433	48.8715	0.977883	0.955181	NotSig
L1MC1	-0.428283	46.5803	0.663572	0.743627	NotSig
L1PA13	-0.456751	43.9639	0.497585	0.595317	NotSig
L2	-0.260731	43.4572	0.942784	0.936548	NotSig
L1MC5a	-0.394351	43.335	0.701766	0.774522	NotSig
MIR3	-0.296973	43.3328	0.891682	0.908493	NotSig
AluJr	0.195498	41.5793	0.987734	0.967512	NotSig
L2b	-0.232544	39.7139	0.956258	0.947631	NotSig
L1ME3A	-0.4044	38.362	0.610319	0.696107	NotSig
L1PA14	-0.48376	38.1036	0.260266	0.346911	NotSig
L1MA4A	-0.433277	37.6872	0.43667	0.534566	NotSig
L1MEd	-0.296089	37.0916	0.858696	0.886672	NotSig
L1PB2	-0.491514	37.0468	0.231922	0.314145	NotSig
MIRc	-0.232163	34.6056	0.939576	0.936755	NotSig
FRAM	-0.420075	33.1576	0.361375	0.450333	NotSig
L1PA15	-0.389263	32.8523	0.534571	0.619147	NotSig
MLT1H	-0.484897	32.1599	0.189689	0.25949	NotSig
MIRb	-0.161449	31.5116	0.985809	0.973538	NotSig
L1M4a1	-0.449995	30.3963	0.224298	0.299321	NotSig
HAL1	-0.26281	29.8634	0.864659	0.885841	NotSig
MIR	-0.169872	29.735	0.981016	0.96675	NotSig
AluSq	0.230417	28.2999	0.922668	0.904891	NotSig
L1MA9	-0.300216	26.3116	0.741886	0.795996	NotSig
LTR33	-0.474622	26.0106	0.145569	0.200194	NotSig
AluSx3	0.177663	25.0043	0.968222	0.947354	NotSig
L1PA7	-0.228784	24.2784	0.887417	0.898518	NotSig
L1ME5	-0.392936	23.9919	0.234564	0.306179	NotSig
L2a	-0.142774	23.8013	0.989395	0.971945	NotSig
MER101-int	-0.48596	23.2446	0.1153	0.163549	NotSig
MER21C	-0.409311	21.8026	0.177197	0.234345	NotSig
MLT1E2	-0.487803	21.7601	0.104771	0.147271	NotSig
MER39	-0.493878	21.6887	0.0996377	0.142214	NotSig
MLT1F2	-0.436853	21.2988	0.139266	0.188833	NotSig
AluYj4	0.33061	20.5376	0.400174	0.392491	NotSig
MSTB	-0.391255	20.2741	0.180027	0.236631	NotSig
AluYg6	0.472647	19.7577	0.120773	0.0994735	NotSig
L1M4c	-0.196784	19.2657	0.94486	0.948601	NotSig
L1MEh	-0.41783	19.2392	0.135039	0.182945	NotSig
L1M4a2	-0.412031	19.2017	0.139606	0.188626	NotSig
L1MC4	-0.206123	19.1157	0.871792	0.888543	NotSig
MSTB1	-0.434053	19.0945	0.120245	0.164242	NotSig
L2c	-0.136735	18.5088	0.981733	0.963563	NotSig
LTR79	-0.478613	18.0135	0.0843901	0.120601	NotSig
MER65-int	-0.494061	17.9279	0.078125	0.112704	NotSig
L1MB8	-0.225381	17.2039	0.788798	0.827584	NotSig
L1MCc	-0.408111	17.1453	0.122585	0.165766	NotSig
MLT1F1	-0.45424	17.1337	0.0913723	0.128013	NotSig
MLT1E1A	-0.420614	15.1469	0.0955993	0.1312	NotSig
LTR78B	-0.487186	14.7645	0.0628397	0.0908146	NotSig
L1M3c	-0.48593	13.8135	0.0582729	0.0853422	NotSig
LTR67B	-0.436693	13.5873	0.0745018	0.104946	NotSig
ERVL-B4-int	-0.381202	13.3989	0.105223	0.141937	NotSig
MSTC	0.355153	13.1391	0.143229	0.130992	NotSig
L1MEc	-0.186604	13.087	0.824804	0.852175	NotSig
L1MD3	-0.269583	12.9436	0.312198	0.37926	NotSig
AluSg4	-0.234515	12.2878	0.529967	0.602106	NotSig
L1M2a	-0.405025	12.2152	0.0851449	0.112219	NotSig
LTR8	-0.412791	12.1359	0.0754831	0.102937	NotSig
L1MEb	-0.368764	11.8411	0.0975996	0.129745	NotSig
MER57-int	-0.445165	11.6901	0.0594052	0.0835411	NotSig
MER4D1	-0.442701	11.474	0.0589146	0.0827792	NotSig
AluYd8	0.484841	11.4152	0.0587636	0.0459268	NotSig
L1M4	-0.153754	11.1136	0.880699	0.892075	NotSig
Harlequin-int	-0.332157	10.9597	0.116319	0.151427	NotSig
MER61-int	-0.340808	10.855	0.110432	0.142214	NotSig
AluSq4	-0.270137	10.7194	0.21022	0.257412	NotSig
LTR50	-0.462731	10.5556	0.0475921	0.0680937	NotSig
L1PB3	-0.242115	10.4353	0.30665	0.367692	NotSig
MSTB2	-0.465587	10.3713	0.0457428	0.0653228	NotSig
MER51A	-0.494877	10.0386	0.0386096	0.0558326	NotSig
LTR8B	-0.471005	9.97101	0.0434405	0.0613743	NotSig
L1HS	-0.236865	9.71865	0.289893	0.347118	NotSig
MER34B-int	-0.490462	9.44008	0.0386473	0.0547243	NotSig
MER4D	-0.43401	9.33289	0.0474789	0.066916	NotSig
MER74A	-0.393946	9.30644	0.060311	0.0818094	NotSig
L1P4a	-0.375297	9.12668	0.0653306	0.0890828	NotSig
LTR82B	-0.494601	8.67228	0.0318916	0.0471737	NotSig
MER50	-0.376493	8.38512	0.0598958	0.0809088	NotSig
LTR33B	-0.486511	7.8266	0.0298158	0.0435024	NotSig
MLT2C1	-0.364718	7.40561	0.0546498	0.0738432	NotSig
MLT1G1	-0.311172	7.40561	0.0822011	0.105292	NotSig
AluSc5	-0.178263	7.29647	0.529363	0.593031	NotSig
MER57B1	-0.439511	7.21516	0.034458	0.048767	NotSig
MER68	-0.326315	7.15502	0.0686141	0.0897756	NotSig
L1M3a	-0.451903	6.77099	0.0303065	0.0428789	NotSig
MLT1G	-0.341316	6.7249	0.0572539	0.0749515	NotSig
LTR87	-0.472922	6.71631	0.0264191	0.0383763	NotSig
LTR23	-0.476129	6.58358	0.0254755	0.0372679	NotSig
FAM	-0.195197	6.56788	0.271399	0.319133	NotSig
MER34	-0.383474	6.32166	0.0406476	0.0549321	NotSig
LTR54	-0.379142	6.26691	0.0409118	0.0552092	NotSig
LTR56	-0.446991	6.19334	0.0281175	0.0391383	NotSig
LTR32	-0.403387	6.16143	0.0380057	0.0502217	NotSig
MER74B	-0.406406	5.89563	0.03242	0.0446107	NotSig
MLT2C2	-0.385373	5.88493	0.0361187	0.0497368	NotSig
AluJr4	0.109834	5.8268	0.885077	0.879884	NotSig
LTR36	-0.429212	5.60084	0.0270984	0.0376836	NotSig
MER21B	-0.240215	5.58465	0.110583	0.135495	NotSig
LTR16B2	-0.424257	5.53672	0.0272494	0.0381685	NotSig
MER41A	-0.248521	5.53414	0.0974109	0.12171	NotSig
MER4CL34	-0.414122	5.50739	0.0293629	0.0403851	NotSig
LTR86A1	-0.386968	5.47533	0.0330993	0.0449571	NotSig
LTR8A	-0.426881	5.37071	0.0260794	0.0365752	NotSig
MER90a	-0.330518	5.14998	0.0449124	0.0583957	NotSig
L1M3de	-0.371057	5.11908	0.0336277	0.0451649	NotSig
LTR10C	-0.383189	5.06357	0.0309103	0.0421169	NotSig
LTR84a	-0.438246	5.05538	0.0227204	0.0322804	NotSig
HERVE-int	-0.454973	5.04531	0.0208333	0.0302023	NotSig
MER90	-0.431677	5.02637	0.0237017	0.0330424	NotSig
MER4C	-0.400675	4.93688	0.0275891	0.0376836	NotSig
LTR7	-0.249987	4.87225	0.0825785	0.100859	NotSig
MER11B	-0.391877	4.86155	0.0286081	0.0387919	NotSig
MER34A1	-0.397506	4.84413	0.0269475	0.0370601	NotSig
L1PA15-16	-0.260967	4.84413	0.071256	0.0903297	NotSig
MER39B	-0.353904	4.59112	0.0336277	0.0445414	NotSig
HERV16-int	-0.459091	4.58346	0.0186066	0.0265309	NotSig
L1PBb	-0.491258	4.55719	0.0157005	0.0232751	NotSig
LTR12C	0.26611	4.44732	0.0715957	0.0644915	NotSig
HERVH48-int	-0.478556	4.42679	0.0162289	0.0234137	NotSig
LTR31	-0.39478	4.36224	0.0242301	0.0331117	NotSig
LTR16	-0.33093	4.29924	0.0354016	0.0466888	NotSig
MLT1A1-int	-0.477122	4.19282	0.0152853	0.0221668	NotSig
HERVIP10F-int	-0.35752	4.14579	0.0283439	0.0384456	NotSig
LTR39	-0.386746	4.10834	0.0239659	0.0323497	NotSig
LTR40b	-0.376621	4.06051	0.0245697	0.0335966	NotSig
L1P4d	-0.489046	3.95296	0.0133605	0.0197423	NotSig
MamGypLTR3	-0.484285	3.93075	0.0137757	0.0200194	NotSig
MamGypsy2-LTR	-0.350848	3.90903	0.0276646	0.0370601	NotSig
MLT1E1	-0.350602	3.90828	0.02774	0.0370601	NotSig
MER92B	-0.352309	3.8793	0.0277023	0.0369216	NotSig
L1MEg2	-0.333415	3.86269	0.0306839	0.0406622	NotSig
MLT1H1	-0.227618	3.82021	0.0771815	0.0939318	NotSig
LTR83	-0.466987	3.81398	0.014304	0.0207814	NotSig
HERVIP10FH-int	-0.26067	3.6514	0.0501208	0.0631061	NotSig
L1M3e	-0.24425	3.60899	0.0575559	0.0716958	NotSig
AluYf1	-0.144907	3.58189	0.241772	0.280133	NotSig
MER21-int	-0.303187	3.4624	0.0333258	0.0428789	NotSig
LTR41	-0.285868	3.37311	0.0370999	0.0471737	NotSig
LTR19-int	-0.444054	3.37194	0.0138134	0.0198809	NotSig
LTR90A	-0.489476	3.27636	0.0107941	0.0160017	NotSig
MSTA	0.121234	3.24646	0.449238	0.46959	NotSig
LTR10A	0.441886	3.20378	0.0163043	0.013023	NotSig
MER57E1	-0.328155	3.13384	0.0255133	0.0329731	NotSig
MER61B	-0.33871	3.12563	0.0230978	0.0306872	NotSig
L1MEa	-0.379814	3.12024	0.0177385	0.0243142	NotSig
LTR24B	-0.351831	3.05044	0.0211353	0.0279163	NotSig
MER67C	-0.194962	3.02312	0.0772192	0.09601	NotSig
MER77B	-0.224569	2.89666	0.0526117	0.0644915	NotSig
LTR26	-0.389136	2.87853	0.0158137	0.0213356	NotSig
LTR2B	0.481103	2.7969	0.0122283	0.00921308	NotSig
HERVK22-int	-0.431149	2.78701	0.0118131	0.0167636	NotSig
AluSg7	0.101391	2.7804	0.626019	0.654821	NotSig
LTR16E1	-0.26732	2.76537	0.0332126	0.042394	NotSig
LTR88b	-0.405822	2.73933	0.0134737	0.0183569	NotSig
MLT2F	-0.275542	2.71009	0.0304952	0.039069	NotSig
MLT-int	-0.456041	2.70794	0.0100393	0.0146162	NotSig
L1M6B	-0.308604	2.70712	0.0234375	0.0307564	NotSig
LTR68	-0.419344	2.70481	0.012115	0.0170407	NotSig
LTR9D	-0.31204	2.65983	0.0229469	0.0297866	NotSig
MamGypLTR2c	-0.385321	2.65766	0.0143418	0.0197423	NotSig
LTR7B	-0.193879	2.60855	0.0666893	0.0793156	NotSig
MER70A	-0.407594	2.57828	0.0125302	0.0171793	NotSig
HERV3-int	-0.437049	2.52948	0.0104167	0.014547	NotSig
MER89-int	-0.323137	2.45228	0.0188708	0.0249377	NotSig
MLT2B2	-0.223807	2.43131	0.0438179	0.0527154	NotSig
LTR25-int	-0.216918	2.42656	0.0449879	0.0559019	NotSig
L1M2c	-0.226367	2.37668	0.0396664	0.0491826	NotSig
MER21A	-0.20484	2.37668	0.0524607	0.062829	NotSig
MLT1E	-0.376678	2.36732	0.0130963	0.0180105	NotSig
LOR1a	-0.295526	2.35645	0.0220411	0.0283319	NotSig
MER11A	-0.22304	2.35501	0.0418176	0.0510529	NotSig
MLT1G1-int	-0.458736	2.3403	0.00841636	0.0121917	NotSig
LTR24	-0.422984	2.33041	0.0100393	0.0142006	NotSig
MLT1-int	-0.398396	2.32572	0.0113602	0.015586	NotSig
MLT1J2-int	-0.314924	2.31908	0.0187575	0.0243835	NotSig
AluYk12	0.365636	2.29571	0.0161911	0.0132308	NotSig
LTR70	-0.343478	2.26263	0.0155495	0.0202272	NotSig
L1P4e	-0.438461	2.25437	0.008907	0.0127459	NotSig
AluYm1	-0.0946781	2.24512	0.485092	0.536714	NotSig
LTR16A1	-0.241846	2.18748	0.0309858	0.0385841	NotSig
LTR90B	-0.33758	2.14887	0.0146437	0.019396	NotSig
MamGypLTR1a	-0.288694	2.11749	0.0202295	0.0257689	NotSig
AluYh3	-0.10191	2.08801	0.284118	0.322873	NotSig
LTR10E	-0.359277	2.08144	0.0128699	0.0169022	NotSig
MER51C	-0.445501	2.06971	0.00777476	0.0110141	NotSig
L1M	-0.250743	2.02632	0.0261171	0.0326268	NotSig
AmnSINE2	-0.314786	2.02145	0.0158514	0.0207121	NotSig
AluYc3	0.148055	2.00448	0.0920516	0.090399	NotSig
LTR6A	-0.258011	2.00018	0.0263436	0.031657	NotSig
HERVL-int	-0.148136	2.00004	0.084843	0.10079	NotSig
MamGypLTR2b	-0.458885	1.99251	0.00701993	0.0100443	NotSig
LTR86C	-0.435127	1.97409	0.00762379	0.0108063	NotSig
MER72	-0.274184	1.97409	0.0202672	0.0262538	NotSig
MER52-int	-0.396217	1.9693	0.00913345	0.0129537	NotSig
MER84	-0.422395	1.96571	0.00800121	0.0113605	NotSig
LTR34	-0.430796	1.94929	0.0078125	0.0109449	NotSig
MER66C	-0.341327	1.93511	0.0127189	0.0167636	NotSig
MLT2A2	-0.152665	1.93423	0.0757473	0.0893599	NotSig
LTR53	-0.332555	1.8769	0.0132473	0.0172485	NotSig
HERVK11D-int	-3.79325	1.8244	3.77415e-05	0.00055417	NotSig
MLT2B3	-0.169731	1.8244	0.0543478	0.0653921	NotSig
MER51E	-0.451242	1.82096	0.00637832	0.00928235	NotSig
LTR9A1	-0.216976	1.76407	0.0299668	0.036506	NotSig
MER52C	-0.417072	1.75025	0.0073596	0.0101829	NotSig
LTR91	-0.394815	1.74756	0.00803895	0.0112219	NotSig
MER76-int	-1.15746	1.74014	0.000754831	0.00180105	NotSig
LTR38	-0.391776	1.73872	0.00834088	0.0114298	NotSig
MER34C	-1.72376	1.73278	0.000301932	0.00103907	NotSig
MLT1G3	-0.140498	1.72132	0.0791818	0.0917152	NotSig
LTR10B2	-2.26254	1.71823	0.000150966	0.000761984	NotSig
LTR71A	-2.07414	1.7175	0.000188708	0.000831255	NotSig
LTR23-int	-0.360191	1.69759	0.0093599	0.0128845	NotSig
LTR19A	-0.342665	1.69759	0.0107563	0.0140621	NotSig
HERV9-int	-0.39326	1.66682	0.00762379	0.0106678	NotSig
LTR27	-20.3329	1.65457	0	0.000415628	NotSig
LTR12	-0.276175	1.64432	0.0163421	0.0206428	NotSig
L1PB	-0.102671	1.63458	0.165987	0.194306	NotSig
LTR86A2	-0.368551	1.6296	0.00856733	0.0116376	NotSig
MLT1G-int	-0.382915	1.6126	0.0078125	0.0106678	NotSig
LTR37-int	-0.128258	1.59234	0.0882775	0.102452	NotSig
MLT2D	-0.108851	1.52761	0.125944	0.146301	NotSig
LTR38B	-0.386538	1.52035	0.00713315	0.00983652	NotSig
HERV15-int	-1.69234	1.51015	0.000264191	0.000900526	NotSig
LTR16D	-0.254914	1.48105	0.0175121	0.0216819	NotSig
LTR15	-0.267227	1.48027	0.015474	0.0196038	NotSig
MLT1E2-int	-2.14473	1.46748	0.000150966	0.000692713	NotSig
MER67B	-0.25002	1.45034	0.0170592	0.0215434	NotSig
LTR21A	0.345871	1.45034	0.0119263	0.00858964	NotSig
ERVL-int	-0.215325	1.44558	0.0232865	0.0286783	NotSig
LTR12E	-0.372299	1.44389	0.00751057	0.00990579	NotSig
HUERS-P2-int	-1.72881	1.43449	0.000226449	0.000831255	NotSig
AluYk11	-0.120924	1.4192	0.0849185	0.0981574	NotSig
LTR46-int	0.327972	1.4143	0.0109828	0.00914381	NotSig
PRIMA41-int	-0.292474	1.40868	0.0117376	0.0150319	NotSig
LTR2752	-3.4418	1.37929	3.77415e-05	0.000415628	NotSig
MER95	-1.23458	1.37864	0.00049064	0.00124688	NotSig
MER66A	-1.38255	1.36845	0.000377415	0.00103907	NotSig
MER61D	-0.40431	1.35953	0.00566123	0.00782765	NotSig
MER73	-0.29518	1.32453	0.0105676	0.0137157	NotSig
LTR28	-1.69387	1.32295	0.000226449	0.000761984	NotSig
LTR7Y	-0.316421	1.29611	0.0093599	0.0119839	NotSig
LTR12F	-0.204455	1.28777	0.0224562	0.0275007	NotSig
HERVL40-int	-0.184071	1.28655	0.0285326	0.0338736	NotSig
MER51B	-0.251604	1.2655	0.014455	0.0180798	NotSig
LTR80A	0.253425	1.2655	0.015625	0.0140621	NotSig
MER57F	-0.247035	1.24973	0.0147192	0.0182183	NotSig
LTR81C	-0.321937	1.23955	0.00811443	0.0106678	NotSig
MER41D	-0.266398	1.22773	0.0123792	0.0153089	NotSig
LTR06	-19.5826	1.2106	0	0.000277085	NotSig
LTR3A	-0.347796	1.20205	0.00675574	0.00900526	NotSig
LTR69	-1.42074	1.18579	0.000301932	0.000831255	NotSig
LTR26E	-1.27044	1.17783	0.000377415	0.000969798	NotSig
LTR12D	-0.315346	1.17319	0.00796347	0.0103214	NotSig
U6	-3.28964	1.16909	3.77415e-05	0.000346356	NotSig
MER51D	-1.48683	1.15747	0.000264191	0.000761984	NotSig
LTR26C	-0.321396	1.15543	0.00743508	0.00976725	NotSig
HERVFH19-int	-0.344025	1.15474	0.00641606	0.00852037	NotSig
LTR28C	-0.272396	1.15474	0.0107186	0.0133001	NotSig
HERVKC4-int	-1.46922	1.14699	0.000264191	0.000761984	NotSig
LTR26D	-2.12702	1.13763	0.000113225	0.000484899	NotSig
MER9a2	0.263619	1.12564	0.0126434	0.0112912	NotSig
MER9B	-20.2975	1.10292	0	0.000277085	NotSig
LTR42	-0.242486	1.10292	0.0127944	0.0158631	NotSig
LTR48B	-0.122793	1.09347	0.0591033	0.0669853	NotSig
MER68C	-2.35298	1.08973	7.54831e-05	0.000415628	NotSig
LTR75B	-1.11582	1.077	0.000452899	0.00103907	NotSig
MER83B-int	-0.272979	1.07104	0.0093599	0.0120532	NotSig
L1M2a1	-0.334159	1.0439	0.00600091	0.0079662	NotSig
LTR40c	-0.247287	1.0439	0.0116244	0.0142699	NotSig
LTR43-int	-0.987039	1.02685	0.000566123	0.00117761	NotSig
MER34-int	-0.198958	0.987792	0.0168705	0.0203658	NotSig
LTR5B	-0.147254	0.986655	0.0326842	0.0376143	NotSig
MamGypLTR1d	-0.194778	0.974313	0.0171724	0.0207121	NotSig
LTR27B	-19.1827	0.968738	0	0.000207814	NotSig
MER50C	18.4024	0.967386	0.000113225	0	NotSig
LTR61	0.202483	0.965391	0.018984	0.0164866	NotSig
AluYk2	0.0854227	0.959229	0.113262	0.11596	NotSig
LTR9C	-0.317011	0.95493	0.00592542	0.00782765	NotSig
MLT1G3-int	-0.285235	0.929592	0.00743508	0.00921308	NotSig
LTR1	-1.65743	0.91046	0.000150966	0.000484899	NotSig
L1M5	-0.0247115	0.903263	0.978865	0.963979	NotSig
LTR4	-1.48184	0.903136	0.000188708	0.00055417	NotSig
MER34D	-0.226941	0.903086	0.0111715	0.0137157	NotSig
LTR1D	0.223333	0.897024	0.0128699	0.0117761	NotSig
PRIMAX-int	-2.70297	0.874467	3.77415e-05	0.000277085	NotSig
MER83	0.185686	0.832957	0.0172479	0.0160709	NotSig
LTR47A2	-0.251262	0.820502	0.00785024	0.0101136	NotSig
MamGyp-int	-0.109886	0.81602	0.0466863	0.0533389	NotSig
LTR41C	-0.155246	0.786552	0.021324	0.0245913	NotSig
LTR35	-0.219717	0.786503	0.00996377	0.0121917	NotSig
MER65C	0.146039	0.786503	0.0252114	0.0252147	NotSig
MER65B	-1.17993	0.775907	0.000264191	0.000623441	NotSig
MSTA1	-0.153106	0.764784	0.0204937	0.0242449	NotSig
LTR2C	-0.215925	0.764225	0.0106809	0.0123996	NotSig
THE1-int	-1.16182	0.762878	0.000264191	0.000623441	NotSig
LTR27C	-0.283696	0.762878	0.00554801	0.00713494	NotSig
L1MDb	-0.10223	0.762164	0.0487243	0.0565254	NotSig
MER68B	-0.111991	0.760225	0.0396664	0.0459268	NotSig
MER48	-1.02266	0.747447	0.000339674	0.000761984	NotSig
LTR18B	-0.787743	0.743009	0.000603865	0.00110834	NotSig
LTR47B3	-1.11895	0.730291	0.000264191	0.000623441	NotSig
HERV17-int	-0.130582	0.730291	0.0272117	0.0315877	NotSig
AluYk3	0.0609731	0.728499	0.172177	0.181352	NotSig
MER34C2	-0.184766	0.721811	0.0129076	0.0153089	NotSig
LTR14C	-18.5039	0.716355	0	0.000138543	NotSig
MER67A	-0.210161	0.713907	0.00947313	0.0116376	NotSig
LTR58	-18.6549	0.712694	0	0.000138543	NotSig
LTR22A	-1.57091	0.674622	0.000113225	0.000346356	NotSig
MER52A	-0.124215	0.669684	0.0269852	0.0308257	NotSig
LTR60	-2.45476	0.668343	3.77415e-05	0.000207814	NotSig
LTR53-int	-0.148836	0.667516	0.0188708	0.0214048	NotSig
LTR22E	-2.44146	0.665829	3.77415e-05	0.000207814	NotSig
L1MB7	-0.0259914	0.662159	0.929989	0.921862	NotSig
MER83B	0.259209	0.656703	0.00622736	0.0055417	NotSig
LTR22B1	-1.52349	0.655845	0.000113225	0.000346356	NotSig
MER87	-1.33382	0.655845	0.000150966	0.000415628	NotSig
MER9a1	0.1936	0.652586	0.0111338	0.0102521	NotSig
UCON49	-2.33895	0.645273	3.77415e-05	0.000207814	NotSig
LTR13	-0.109418	0.627801	0.032571	0.0367138	NotSig
LTR5	-1.73716	0.626713	7.54831e-05	0.000277085	NotSig
LTR30	-1.69452	0.611678	7.54831e-05	0.000277085	NotSig
MER61F	-0.187927	0.610218	0.00977506	0.011499	NotSig
MER92C	-0.827464	0.60723	0.000415157	0.000761984	NotSig
MER110	-0.126127	0.590904	0.021022	0.0246606	NotSig
MER101B	-0.204502	0.585494	0.00758605	0.00914381	NotSig
LTR10F	-0.139109	0.57966	0.0173611	0.0194652	NotSig
HERVK14C-int	-0.972117	0.578113	0.000264191	0.00055417	NotSig
AluYk4	-0.051552	0.553138	0.157231	0.174494	NotSig
AluYc	-0.0381252	0.529154	0.43316	0.476794	NotSig
LTR38A1	-1.1845	0.513004	0.000150966	0.000346356	NotSig
MER31B	-0.0709799	0.496189	0.0585749	0.0653228	NotSig
LTR27D	0.372401	0.491626	0.00196256	0.00173178	NotSig
LTR55	-0.184093	0.478257	0.00717089	0.00858964	NotSig
LTR72B	-1.28954	0.477488	0.000113225	0.000277085	NotSig
LTR7C	0.118681	0.470405	0.0185311	0.0182876	NotSig
LTR19B	-0.162579	0.47005	0.00898249	0.0105292	NotSig
MER41E	0.10464	0.456845	0.0226449	0.0228595	NotSig
MER74C	-1.23294	0.455573	0.000113225	0.000277085	NotSig
MER66D	-0.176811	0.453455	0.00705767	0.00852037	NotSig
MER4D0	-0.120207	0.452209	0.0161534	0.0184262	NotSig
LTR19C	0.782425	0.449873	0.000452899	0.000277085	NotSig
LTR1B0	-18.5596	0.44571	0	6.92713e-05	NotSig
LTR47B	-17.6513	0.44571	0	6.92713e-05	NotSig
LTR22C	-17.6311	0.44571	0	6.92713e-05	NotSig
LTR1C	-17.5681	0.44571	0	6.92713e-05	NotSig
LTR1C1	-17.5051	0.44571	0	6.92713e-05	NotSig
LTR1F	-1.46225	0.44571	7.54831e-05	0.000207814	NotSig
LTR59	-1.04337	0.44571	0.000150966	0.000346356	NotSig
LTR39-int	-0.245845	0.44571	0.003359	0.00429482	NotSig
LTR22B	-0.169927	0.44571	0.00728412	0.00872818	NotSig
MER54A	-0.100539	0.44571	0.0224185	0.0255611	NotSig
U3	16.7346	0.44571	3.77415e-05	0	NotSig
HERV30-int	16.8057	0.44571	3.77415e-05	0	NotSig
UCON86	16.8659	0.44571	3.77415e-05	0	NotSig
L1ME1	-0.0170127	0.442307	0.958824	0.947423	NotSig
LTR45B	0.158697	0.442307	0.00905797	0.00852037	NotSig
MER101	0.149311	0.43808	0.0100393	0.00962871	NotSig
LTR1A2	-0.115447	0.435639	0.0160402	0.0181491	NotSig
LTR35B	0.772945	0.435489	0.000415157	0.000277085	NotSig
L1P4b	-1.15238	0.433911	0.000113225	0.000277085	NotSig
MLT1L-int	-1.89072	0.427325	3.77415e-05	0.000138543	NotSig
LTR77	-1.84358	0.417746	3.77415e-05	0.000138543	NotSig
MSR1	0.73321	0.414003	0.00049064	0.000277085	NotSig
MER92A	-1.8009	0.408777	3.77415e-05	0.000138543	NotSig
MER52D	0.205851	0.391101	0.00452899	0.004087	NotSig
LTR62	-0.10979	0.388391	0.0151721	0.0169022	NotSig
HERV9N-int	0.154433	0.365406	0.00709541	0.00671931	NotSig
LTR14A	-0.727953	0.34765	0.000226449	0.000415628	NotSig
MER57C1	-0.151991	0.34765	0.0064538	0.00741203	NotSig
LTR14B	-0.103484	0.346769	0.0141153	0.0157938	NotSig
LTR13A	0.105241	0.346769	0.0151344	0.0144084	NotSig
HERVL32-int	-0.797443	0.345093	0.000188708	0.000346356	NotSig
LTR51	-0.131129	0.328379	0.00803895	0.00914381	NotSig
MLT1E1A-int	-1.40241	0.318379	3.77415e-05	0.000138543	NotSig
LTR72	-0.516361	0.31489	0.000377415	0.000692713	NotSig
LTR81	-0.834108	0.314104	0.000150966	0.000277085	NotSig
MER41G	-1.33182	0.301985	3.77415e-05	0.000138543	NotSig
LTR16A	-0.0428449	0.285913	0.0697464	0.0772375	NotSig
LTR1B	-0.581056	0.272908	0.000264191	0.000415628	NotSig
HERVIP10B3-int	-0.0763843	0.251609	0.0160779	0.0178027	NotSig
MER70B	-0.0953211	0.243438	0.0098128	0.0108756	NotSig
LTR41B	-0.0604839	0.239101	0.0242678	0.0265309	NotSig
LTR17	-0.0557126	0.235314	0.028042	0.0302023	NotSig
L1PB1	-0.0153418	0.235314	0.832994	0.839083	NotSig
MLT2B1	0.0314038	0.235314	0.102846	0.111873	NotSig
LTR10B1	-0.554005	0.222859	0.000188708	0.000346356	NotSig
LTR57	-0.420569	0.205155	0.000339674	0.000484899	NotSig
LTR47A	-0.0655865	0.205155	0.0157005	0.0175256	NotSig
MLT2B5	-0.328236	0.204409	0.000528382	0.000761984	NotSig
LTR53B	-0.827445	0.199051	7.54831e-05	0.000138543	NotSig
LTR14	-0.543631	0.19833	0.000188708	0.000277085	NotSig
LTR2	-0.0456295	0.193749	0.0319671	0.0342893	NotSig
AluSx4	-0.0146245	0.193749	0.724487	0.758313	NotSig
MER76	-0.0663924	0.189652	0.0133228	0.0144777	NotSig
MER83C	-0.43958	0.152946	0.000188708	0.000277085	NotSig
HERVL66-int	-0.343896	0.1489	0.000301932	0.000415628	NotSig
LTR75	0.0647571	0.148255	0.0101147	0.00997506	NotSig
LTR22C0	-0.477149	0.143861	0.000150966	0.000207814	NotSig
MER9a3	-0.0428124	0.143861	0.0212485	0.0231366	NotSig
MLT2A1	0.0227587	0.1257	0.0687651	0.0725963	NotSig
MLT2B4	0.0174967	0.119868	0.115414	0.129329	NotSig
LTR44	-0.0618262	0.113448	0.00686896	0.00734275	NotSig
LTR27E	-0.260229	0.108273	0.000377415	0.000415628	NotSig
AluYe6	0.0275017	0.105163	0.0318539	0.0329731	NotSig
LTR47B4	-0.358271	0.103366	0.000150966	0.000207814	NotSig
MER66B	-0.0200394	0.085735	0.0446482	0.0479357	NotSig
HERVI-int	-0.0424976	0.0742813	0.00709541	0.00782765	NotSig
LTR1D1	0.0379802	0.0680723	0.0082654	0.00838182	NotSig
MER11D	0.0352421	0.0640615	0.00837862	0.00879745	NotSig
LTR66	-0.0335198	0.0625215	0.00883152	0.00962871	NotSig
LTR3B	0.2435	0.0583894	0.000150966	0.000138543	NotSig
AluSq10	-0.00794322	0.0560461	0.190104	0.205805	NotSig
LTR46	0.0206769	0.0490414	0.0158892	0.0167636	NotSig
MLT1H-int	0.0115208	0.0313451	0.0276268	0.029371	NotSig
AluYh7	-0.0115557	0.0185545	0.0132095	0.0139235	NotSig
MER57E3	-0.0115326	0.0185545	0.0138889	0.0146162	NotSig
HERV9NC-int	0.0136369	0.0175393	0.00815217	0.00845109	NotSig
LTR35A	0.145186	0.0175393	7.54831e-05	6.92713e-05	NotSig
MLT1N2-int	0.102099	0.0093223	7.54831e-05	6.92713e-05	NotSig
HERVL18-int	0.0372647	0.00164368	0.000188708	0.000207814	NotSig
L1P4c	0	0	0	0	NotSig
LTR109A2	0	0	0	0	NotSig
LTR10B	0	0	0	0	NotSig
LTR18A	0	0	0	0	NotSig
LTR18C	0	0	0	0	NotSig
LTR1C3	0	0	0	0	NotSig
LTR21B	0	0	0	0	NotSig
LTR21C	0	0	0	0	NotSig
LTR22	0	0	0	0	NotSig
LTR22B2	0	0	0	0	NotSig
LTR7A	0	0	0	0	NotSig
MLT1E-int	0	0	0	0	NotSig
MLT1E1-int	0	0	0	0	NotSig
MLT1O-int	0	0	0	0	NotSig
MSTA1-int	0	0	0	0	NotSig
U8	0	0	0	0	NotSig
MER65D	0.00194994	0	0.0152098	0.015586	NotSig
LTR3	0.0335072	0	0.000113225	0.000138543	NotSig
AluYa5	1.36391	307.653	0.62534	0.485453	Up
AluYb8	1.87377	307.653	0.550159	0.336104	Up
AluYb9	1.81627	250.912	0.145871	0.0549321	Up
MSTB1-int	2.60021	238.156	0.079446	0.0159324	Up
MLT2E	2.70184	140.795	0.0439689	0.0079662	Up
LTR29	0.897876	94.6063	0.205125	0.146717	Up
LTR52	1.50366	62.757	0.043667	0.0189111	Up
LTR16C	0.735365	58.6956	0.169082	0.128775	Up
AluYa8	0.990925	56.8875	0.0846165	0.0499446	Up
AluYe5	0.524944	38.6918	0.237772	0.202896	Up
AluYh3a3	0.846435	33.5126	0.0628774	0.0394846	Up
MER4B-int	0.633865	31.3037	0.107337	0.0825713	Up
AluYi6	0.55306	16.2485	0.0669912	0.0509144	Up
LTR47B2	0.754616	10.7472	0.0252868	0.0146855	Up
HERVK13-int	0.735861	7.21616	0.015625	0.00997506	Up
LTR1A1	0.597138	2.89716	0.00834088	0.00595733	Up
